# Supplementary material for: “Visualizing” the partially reversible conversion of gold nanoclusters via the Au23(S-c-C6H11)17 intermediate
Source: Royal Society of Chemistry journal article supplement (doi:10.1039/d4sc01225a), 2024-01-01
Supplement: d4sc01225a1.pdf [file d4sc01225a1.pdf]

---

## Supporting Information

### **"Visualizing" the partially reversible conversion of gold nanoclusters via Au<sub>23</sub>(S-c-C<sub>6</sub>H<sub>11</sub>)<sub>17</sub> intermediate**

*Saniya Gratiious,<sup>a</sup> Afreen,<sup>‡b</sup> Eti Mahal,<sup>‡c</sup> Jibin Thomas,<sup>a</sup> Shubhadeep Saha,<sup>a</sup> Akhil S. Nair,<sup>c</sup> K. V. Adarsh,<sup>b</sup> Biswarup Pathak,  
<sup>c</sup> Sukhendu Mandal<sup>a\*</sup>*

<sup>a</sup>School of Chemistry, Indian Institute of Science Education and Research Thiruvananthapuram, Maruthamala P.O, Trivandrum, India-695551. Email: [sukhendu@iisertvm.ac.in](mailto:sukhendu@iisertvm.ac.in)

<sup>b</sup>Department of Physics, Indian Institute of Science Education and Research Bhopal, Madhya Pradesh 462066, India.

<sup>c</sup>Discipline of Chemistry, School of Basic Sciences, Indian Institute of Technology Indore, Indore, Madhya Pradesh 453552, India.

## Table of contents

| Name       | Description                                                                                                                                                                                                                                                              | Page No. |
|------------|--------------------------------------------------------------------------------------------------------------------------------------------------------------------------------------------------------------------------------------------------------------------------|----------|
|            | Experimental section                                                                                                                                                                                                                                                     | S3-S5    |
| Figure S1  | UV-vis absorption and MALDI-MS spectra of the synthesized $[\text{Au}_{23}(\text{S-c-C}_6\text{H}_{11})_{16}]^-$ NC                                                                                                                                                      | S6       |
| Figure S2  | UV-vis absorption spectra of $[\text{Au}_{25}(\text{FBT})_{18}]^-$ NC, $[\text{Au}_{25}(\text{CBT})_{18}]^-$ NC and $[\text{Au}_{25}(\text{BBT})_{18}]^-$ NC                                                                                                             | S7-S8    |
| Figure S3  | Negative-ion mode ESI mass spectra of $[\text{Au}_{25}(\text{FBT})_{18}]^-$ NC, $[\text{Au}_{25}(\text{CBT})_{18}]^-$ NC and $[\text{Au}_{25}(\text{BBT})_{18}]^-$ NC                                                                                                    | S9-S10   |
| Figure S4  | Positive-ion mode ESI mass spectra of $[\text{Au}_{25}(\text{XBT})_{18}]^-$ NC showing the presence of $\text{TOA}^+$ counter cation                                                                                                                                     | S10      |
| Figure S5  | Optical microscope image of the single crystals of $[\text{Au}_{25}(\text{FBT})_{18}]^-$ NC. The total structure of the $[\text{Au}_{25}(\text{FBT})_{18}]^-$ NC.                                                                                                        | S11      |
| Table S1   | Crystal structure refine parameters of $[\text{Au}_{25}(\text{FBT})_{18}]^-$ NC                                                                                                                                                                                          | S12      |
| Table S2   | Selected bond distances observed in $[\text{Au}_{25}(\text{FBT})_{18}]^-$ NC                                                                                                                                                                                             | S13-S14  |
| Figure S6  | Relaxed structure of the $[\text{Au}_{25}(\text{XBT})_{18}]^-$ NCs, X = F, Cl, Br.                                                                                                                                                                                       | S15      |
| Table S3   | Table showing the electronic properties of the $[\text{Au}_{25}(\text{XBT})_{18}]^-$ NCs, X = F, Cl, Br.                                                                                                                                                                 | S16      |
| Figure S7  | Density of states of the $[\text{Au}_{25}(\text{FBT})_{18}]^-$ , $[\text{Au}_{25}(\text{CBT})_{18}]^-$ , $[\text{Au}_{25}(\text{BBT})_{18}]^-$ NCs                                                                                                                       | S17-S18  |
| Figure S8  | Contour plot and corresponding cross-sections at selected probe delay times illustrating the ultrafast transient absorption spectrum of (a, b) $[\text{Au}_{23}(\text{S-c-C}_6\text{H}_{11})_{16}]^-$ NC and (c, d) $\text{Au}_{23}(\text{S-c-C}_6\text{H}_{11})_{17}$ . | S19      |
| Figure S9  | TA decay kinetics of the $[\text{Au}_{23}(\text{S-c-C}_6\text{H}_{11})_{16}]^-$ and the $\text{Au}_{23}(\text{S-c-C}_6\text{H}_{11})_{17}$ species at 750 nm                                                                                                             | S20      |
| Figure S10 | The time-associated femtosecond transient absorption spectra of the $[\text{Au}_{25}(\text{FBT})_{18}]^-$ , $[\text{Au}_{25}(\text{CBT})_{18}]^-$ , $[\text{Au}_{25}(\text{BBT})_{18}]^-$ NCs at different delay times                                                   | S20-S21  |
| Figure S11 | TA decay kinetics of the $[\text{Au}_{25}(\text{XBT})_{18}]^-$ NCs at (a) 560 nm. TA decay kinetics of the $[\text{Au}_{25}(\text{XBT})_{18}]^-$ NCs and the $[\text{Au}_{23}(\text{S-c-C}_6\text{H}_{11})_{16}]^-$ at 750 nm                                            | S22      |
| Figure S12 | Nanosecond transient absorption decay kinetics of $[\text{Au}_{25}(\text{FBT})_{18}]^-$ NCs, $[\text{Au}_{25}(\text{CBT})_{18}]^-$ NCs, $[\text{Au}_{25}(\text{BBT})_{18}]^-$ NCs at 560 nm and 750 nm                                                                   | S23      |
| Figure S13 | a) and b) Time-dependent MALDI-MS spectra of the transformation reaction of $\text{Au}_{23}(\text{S-c-C}_6\text{H}_{11})_{17}$ intermediate species with BBT                                                                                                             | S24      |
| Table S4   | Optimized structure coordinates of $[\text{Au}_{23}(\text{S-c-C}_6\text{H}_{11})_{16}]^-$ NC, $\text{Au}_{23}(\text{S-c-C}_6\text{H}_{11})_{17}$ , intermediate species and $[\text{Au}_{25}(\text{BBT})_{18}]^-$ NCs                                                    | S25-S81  |
|            | References                                                                                                                                                                                                                                                               | S82      |

---

## I. Experimental section

### 1.1. Materials

All chemicals were purchased commercially and were used without prior purification. Tetrachloroauric (III) acid ( $\text{HAuCl}_4 \cdot 3\text{H}_2\text{O}$ , > 99.9% metals basis), tetraoctylammonium bromide (TOAB,  $\geq 98\%$ ), cyclohexane thiol (*S-c-C*<sub>6</sub>H<sub>11</sub>; 97%), sodium borohydride ( $\text{NaBH}_4$ , 99.99%, trace metal basis), trans-2-[3-(4-tert-butylphenyl)-2-methyl-2 propenylidene] malononitrile (DCTB, > 99.0%) were purchased from Sigma-Aldrich. MeOH (HPLC grade, 99.9%, Spectrochem), toluene (HPLC grade, 99.9%, Spectrochem), Dimethylene chloride (DCM, HPLC grade, 99.9%, Spectrochem), Tetrahydrofuran (THF, HPLC grade, 99.9%, Spectrochem), 4-Fluorothiophenol (*p*-FC<sub>6</sub>H<sub>4</sub>SH; 98%), 4-Chlorothiophenol (*p*-ClC<sub>6</sub>H<sub>4</sub>SH; 97%), 4-Bromothiophenol (*p*-BrC<sub>6</sub>H<sub>4</sub>SH; 95%), Thiophenol (C<sub>6</sub>H<sub>5</sub>SH; 97%), PTFE syringe filters (0.2  $\mu\text{m}$ , Corning, Germany) and BioBeads S- X1 (BioRad) were used as purchased. The water used in all experiments was ultrapure (resistivity: 18.2 M $\Omega$  cm), produced by a Milli-Q NANO pure water system. All glassware was thoroughly cleaned with aqua regia (HCl: HNO<sub>3</sub>= 3:1, v: v) and rinsed with abundant pure water.

### 1.2. Methods

**Synthesis of [Au<sub>23</sub>(S-*c*-C<sub>6</sub>H<sub>11</sub>)<sub>16</sub>]<sup>-</sup> nanocluster.** The synthesis of [Au<sub>23</sub>(S-*c*-C<sub>6</sub>H<sub>11</sub>)<sub>16</sub>]<sup>-</sup> was conducted as per the previously reported method.<sup>19</sup> Firstly,  $\text{HAuCl}_4 \cdot 3\text{H}_2\text{O}$  (0.6 mmol, 236.3 mg) and tetraoctylammonium bromide (TOAB, 0.696 mmol, 380 mg) were dissolved in 30 mL of methanol in a 50 mL tri-necked round-bottom flask. The color of the solution changed from yellow to dark reddish-orange upon vigorous stirring for 15 min. To this solution, an excess of 1-cyclohexanethiol was added (3.2 mmol, 390  $\mu\text{L}$ ) was added to the mixture at room temperature. The solution turned yellowish from reddish brown almost immediately, indicating the formation of Au(I) from Au(III) complexes. After 15 min,  $\text{NaBH}_4$  (6 mmol, 227 mg dissolved freshly in 12 mL of cold nano pure water) was rapidly added to the solution under vigorous stirring. The formation of a black-colored solution indicated the formation of Au NCs, which was further precipitated out of the solution using methanol. The reaction mixture was further allowed to stir overnight which finally yielded the pure [Au<sub>23</sub>(S-*c*-C<sub>6</sub>H<sub>11</sub>)<sub>16</sub>]<sup>-</sup> NC.

---

**Transformation of [Au<sub>23</sub>(S-*c*-C<sub>6</sub>H<sub>11</sub>)<sub>16</sub>]<sup>-</sup> nanocluster using FBT:** 5 mg of [Au<sub>23</sub>(S-*c*-C<sub>6</sub>H<sub>11</sub>)<sub>16</sub>]<sup>-</sup> was dissolved in 1 mL of dichloromethane and was centrifuged at (25 °C, 10000 rpm) for 10 minutes to remove any insoluble particles. 0.25 mL *p*-Flurothiophenol was added to the supernatant and heated at 40 °C. The reaction was continued for two hours. Small aliquots were taken from the reaction mixture for the UV-Vis spectroscopy and MALDI-MS measurements. The obtained product was purified using size-exclusion chromatography (SEC), filtered using a 0.2 μm PTFE syringe filter, and dried using rotavapor. Single crystals of the as-prepared NCs were obtained by layering the DCM solution of NCs with hexane in less than a week at room temperature.

**Transformation of [Au<sub>23</sub>(S-*c*-C<sub>6</sub>H<sub>11</sub>)<sub>16</sub>]<sup>-</sup> nanocluster using CBT/ BBT:** 5 mg of [Au<sub>23</sub>(S-*c*-C<sub>6</sub>H<sub>11</sub>)<sub>16</sub>]<sup>-</sup> was dissolved in 1 mL of dichloromethane and was centrifuged at (25 °C, 10000 rpm) for 10 minutes to remove any insoluble particles. 290 mg *p*-chlorothiophenol/ 378 mg *p*-bromothiophenol was added to the supernatant and heated at 40 °C. The reaction was continued for three hours. Small aliquots were taken from the reaction mixture for the UV-Vis spectroscopy and MALDI-MS measurements. The obtained product was purified using size-exclusion chromatography (SEC), filtered using a 0.2 μm PTFE syringe filter, and dried using rotavapor. Single crystals of the as-prepared NCs were obtained by layering the DCM solution of NCs with hexane in less than a week at room temperature.

## II. Characterization

The absorption spectra were obtained on a UV-3800 SHIMADZU UV-Vis NIR spectrometer using dichloromethane as a solvent. The mass spectra of the NC samples were acquired by using a Bruker Microflex MALDI-TOF mass spectrometer. DCTB was used as a matrix and the sample was prepared as 1 mg in 100 μL of dichloromethane for the same. From the stock solution, various amounts of the stock solution were taken and mixed with 1 μL of the analyte solution. The molecules were ionized with the Nd: YAG laser ( $\lambda = 266$  nm). The analyte concentration was optimized to get a well-resolved spectrum. ESI mass spectra were recorded using a Waters Q-TOF mass spectrometer equipped with a Z-Spray source. The source temperature was kept at 70 °C. The sample was directly infused into the chamber at 5 μL/min. The spray voltage was kept at 3.0 kV and the cone voltage at 30 V. To prepare the ESI sample, clusters were dissolved in dichloromethane (1 mg/ mL) and diluted (2: 1 v) using methanol solvent. Femtosecond transient absorption measurements were conducted by dissolving the NCs in DCM and exciting with a 400

---

nm pump with a fluence of 490 nJ/cm<sup>2</sup> and a white light probe (500-730 nm) was used to measure the absorption in the excited state.

## 2.1 Single Crystal X-Ray Diffraction

The single crystal of Au<sub>25</sub>(FC<sub>6</sub>H<sub>4</sub>S)<sub>18</sub> with dimensions of 0.125 mm x 0.225 mm x 0.288 mm was mounted on Bruker D8 Quest - Microfocus SCXRD (single crystal X-ray diffractometer) with Bruker PHOTON III C14, CPAD detector using MoK $\alpha$  radiation ( $\lambda = 0.71073$  Å). The total exposure time for data collection was 1.87 hours. The frames were integrated with the Bruker SAINTS software package using a narrow-frame algorithm. The crystal structure was solved and refined by SHELXTL software package.<sup>S1, S2, S3, S4</sup> The extra framework cation, tetraoctyl ammonium was not detected properly based on the single crystal data. However, we could identify it through ESI-MS data.

## III. Computational Details

The density functional theory (DFT) calculations were performed using Generalized gradient approximation as implemented in Perdew–Burke–Ernzerhof (PBE) functional with the help of Vienna Ab Initio Software Package (VASP).<sup>S5, S6</sup> To describe the electron-ion interactions projector augmented wave (PAW) method was employed along with an energy cutoff of 470 eV.<sup>S7, S8</sup> We have fit the nanocluster inside a  $30 \times 30 \times 30$  Å<sup>3</sup> cubic cell to avoid periodic interactions. A gamma-centered (1 $\times$ 1 $\times$ 1) k-point was used to sample the Brillouin zone. DFT-D3 dispersion correction as implemented by Grimme was used.<sup>S9</sup> The equations used for the calculation of cohesive energy of the core ( $E_c$ ) and shell-to-core binding energy ( $E_{sc}$ ) are as follows:

$$E_c = \frac{E_{\text{cluster}} - n \times E_{\text{Au}} - E_{\text{shell}}}{n + n_{\text{shell-int}}}$$

$$E_{sc} = \frac{E_{\text{cluster}} - E_{\text{core}} - E_{\text{shell}}}{n_{\text{shell-int}}}$$

Where  $E_{\text{cluster}}$  is the total energy of the cluster,  $E_{\text{Au}}$  is the energy of a single gold atom,  $E_{\text{core}}$  is the energies of gold core and  $E_{\text{shell}}$  is the single point energies of the surrounding shell at the optimized geometries of the clusters,  $n$  is the number of core gold atoms and  $n_{\text{shell-int}}$  is the number of shell units interacting with the core.

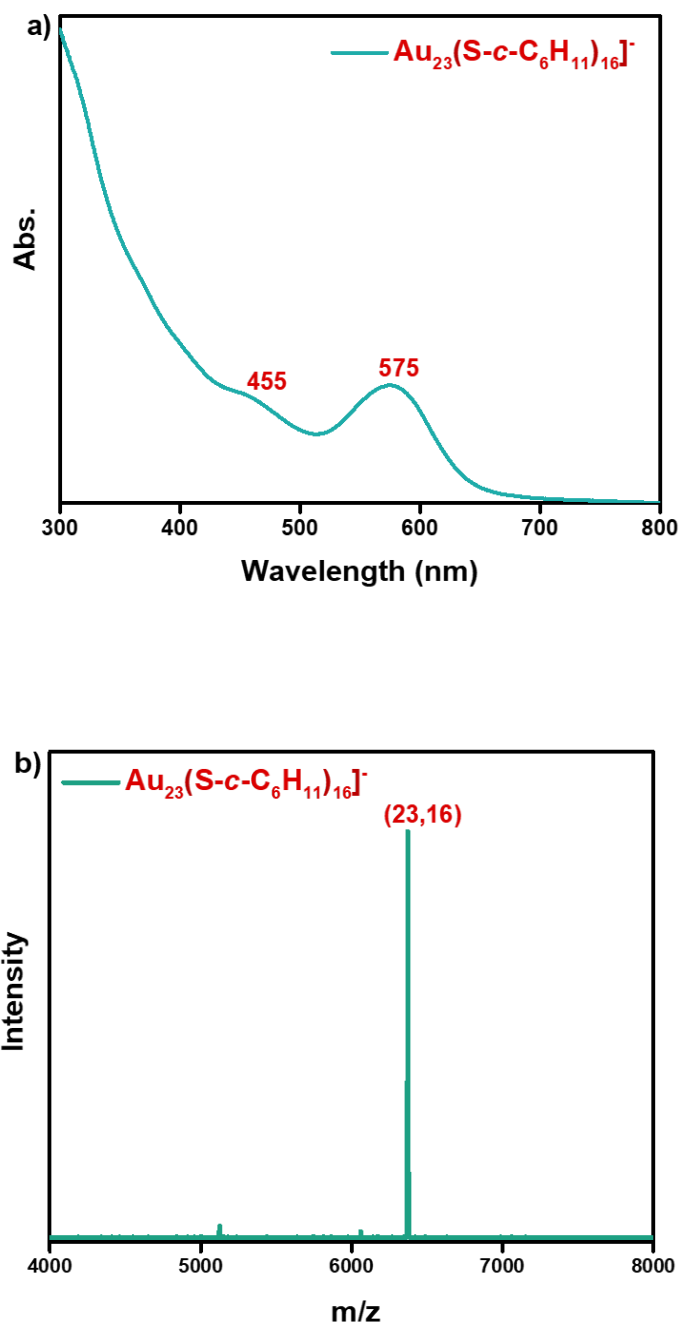

**Figure S1.** a) UV-vis absorption spectrum and b) MALDI-MS spectrum of the synthesized  $[\text{Au}_{23}(\text{S-c-C}_6\text{H}_{11})_{16}]^-$  NC.

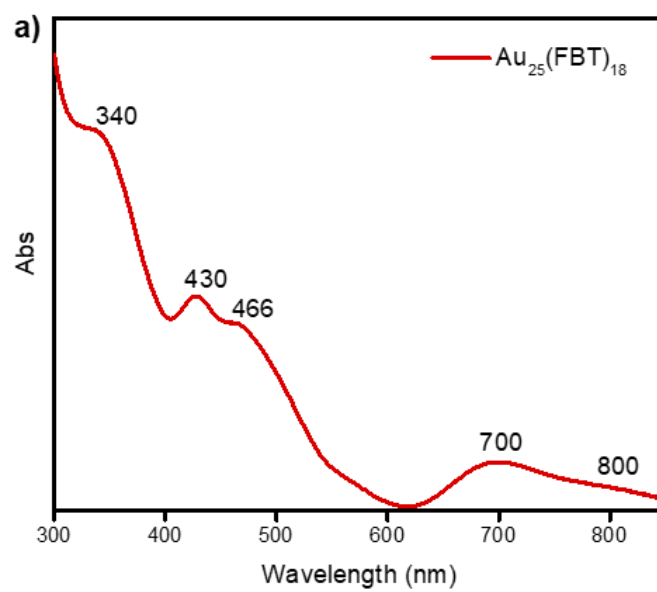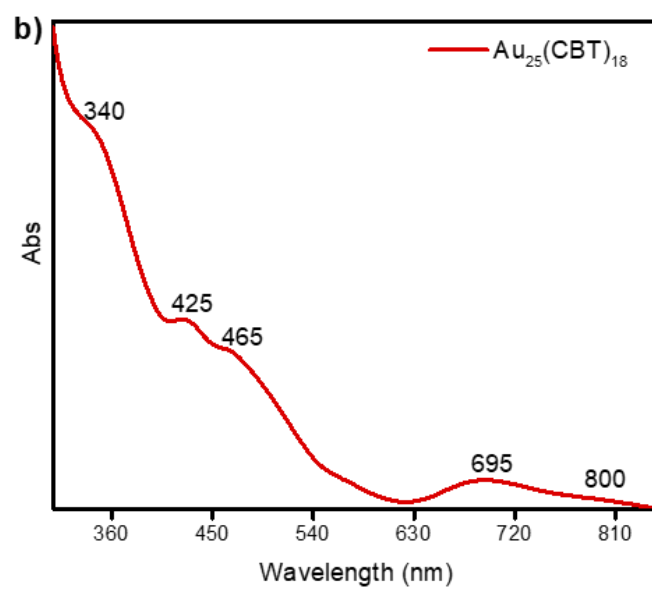

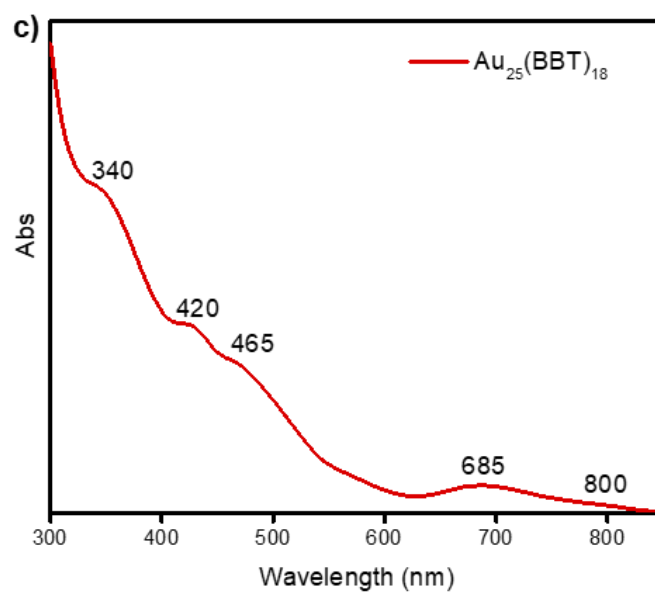

**Figure S2.** UV-vis absorption spectra of a)  $[\text{Au}_{25}(\text{FBT})_{18}]^-$ , b)  $[\text{Au}_{25}(\text{CBT})_{18}]^-$  and c)  $[\text{Au}_{25}(\text{BBT})_{18}]^-$  NCs.



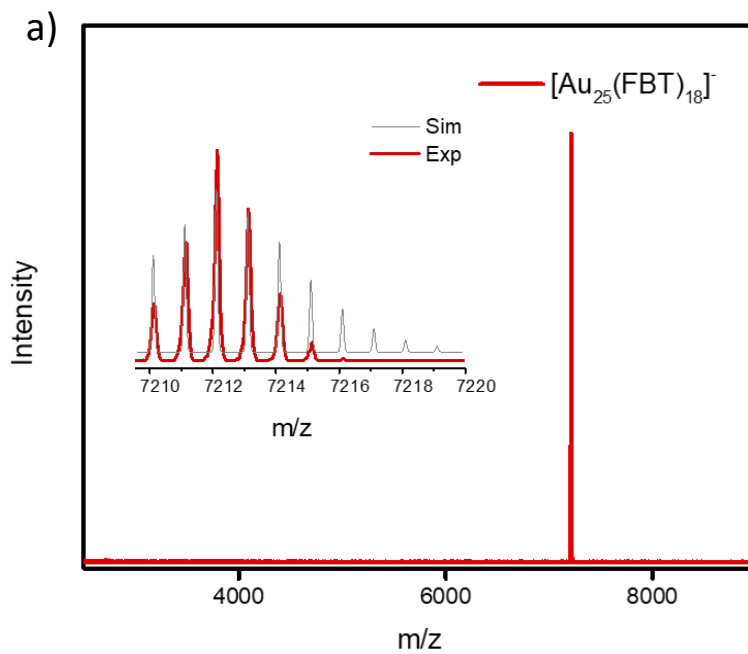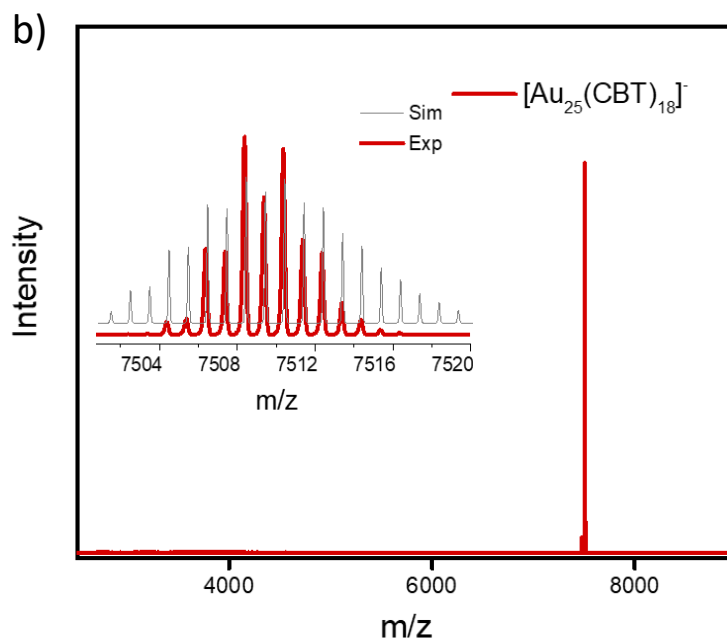

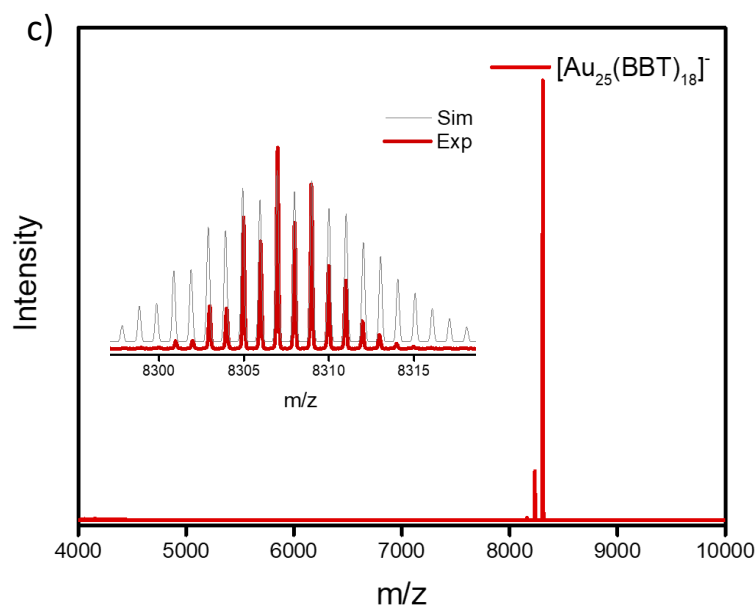

**Figure S3.** Negative-ion mode ESI mass spectra of a)  $[\text{Au}_{25}(\text{FBT})_{18}]^{-}$ , b)  $[\text{Au}_{25}(\text{CBT})_{18}]^{-}$ , and c)  $[\text{Au}_{25}(\text{BBT})_{18}]^{-}$  NCs. The inset shows the respective experimental and simulated isotopic patterns.

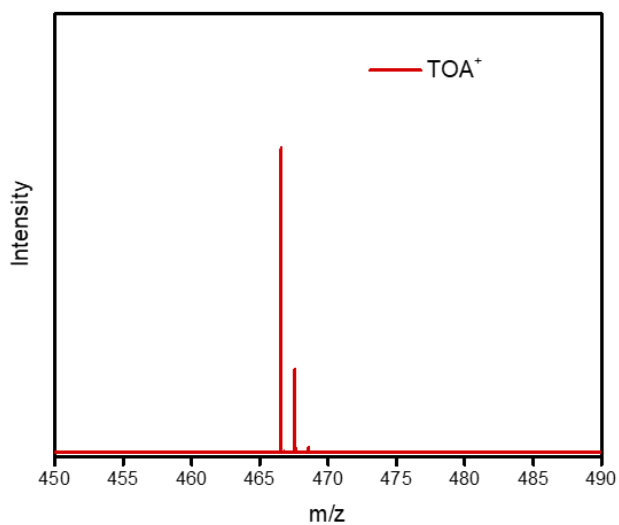

**Figure S4.** Positive-ion mode ESI mass spectra of  $[\text{Au}_{25}(\text{XBT})_{18}]^{-}$  NCs showing the presence of  $\text{TOA}^{+}$  counter cation.

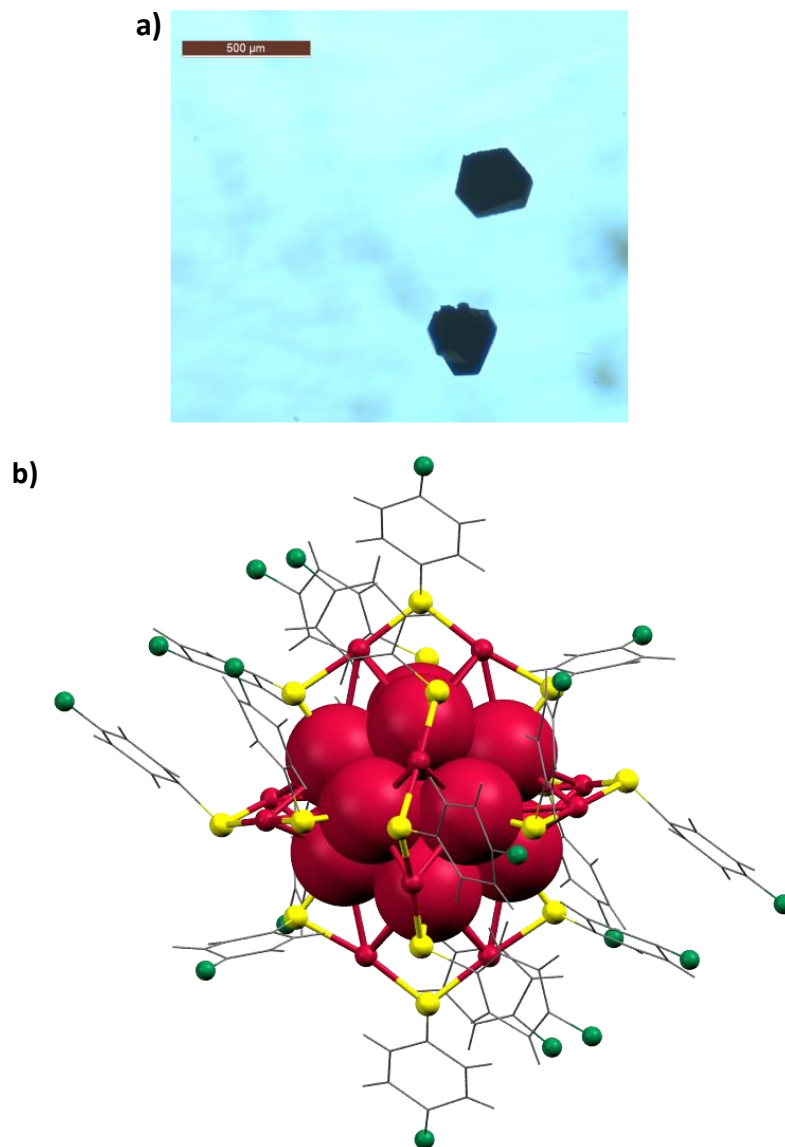

**Figure S5.** a) Optical microscope image of the single crystals of  $\text{Au}_{25}(\text{FBT})_{18}$  NC. b) Total structure of the  $[\text{Au}_{25}(\text{FBT})_{18}]^-$  NC. Color legend: red sphere, Au; yellow sphere, S; green sphere, F; grey stick, C and H.

**Table S1.** Crystal structure refinement parameters of [Au<sub>25</sub>(FBT)<sub>18</sub>]<sup>-</sup> NC.

|                                             |                                                               |
|---------------------------------------------|---------------------------------------------------------------|
| Identification code                         | 0061_260324_SG53A                                             |
| Empirical formula                           | C108 H72 Au25 F18 S18                                         |
| CCDC number                                 | 2334107                                                       |
| Formula weight                              | 7212.89 g/mol                                                 |
| Temperature/K                               | 100                                                           |
| Wavelength/Å                                | 0.71073                                                       |
| Crystal system                              | Monoclinic                                                    |
| Space group                                 | <i>C2/c</i> (No. 15)                                          |
| <i>a</i> /Å                                 | 29.6682(14)                                                   |
| <i>b</i> /Å                                 | 17.7115(9)                                                    |
| <i>c</i> /Å                                 | 34.7181(18)                                                   |
| $\alpha$ /°                                 | 90                                                            |
| $\beta$ /°                                  | 114.038(2)                                                    |
| $\gamma$ /°                                 | 90                                                            |
| Volume/Å <sup>3</sup>                       | 16661.1(15)                                                   |
| <i>Z</i>                                    | 4                                                             |
| $\rho_{\text{calc}}/\text{cm}^3$            | 2.876                                                         |
| $\mu/\text{mm}^{-1}$                        | 22.190                                                        |
| F(000)                                      | 12580.0                                                       |
| Crystal size/mm <sup>3</sup>                | 0.125 × 0.225 × 0.288                                         |
| 2 $\theta$ range for data collection/°      | 2.08 to 25.03                                                 |
| Index ranges                                | -35 ≤ <i>h</i> ≤ 32, -21 ≤ <i>k</i> ≤ 21, -41 ≤ <i>l</i> ≤ 41 |
| Reflections collected                       | 185497                                                        |
| Independent reflections                     | 14690 [R(int) = 0.0498]                                       |
| Data/restraints/parameters                  | 14690/80/791                                                  |
| Goodness-of-fit on F <sup>2</sup>           | 1.167                                                         |
| Final R indexes [I ≥ 2 $\sigma$ (I)]        | R <sub>1</sub> = 0.0610, wR <sub>2</sub> = 0.1451             |
| Largest diff. peak/hole / e Å <sup>-3</sup> | 3.328 and -2.689                                              |

**Table S2.** Selected bond distances in  $[\text{Au}_{25}(\text{FBT})_{18}]^{-}$  NC.

| <b>Atoms</b>    | <b>Bond length (Å)</b> |
|-----------------|------------------------|
| Au(01) – Au(6A) | 2.7534(8)              |
| Au(01) – Au(6A) | 2.7534(8)              |
| Au(01) – Au(03) | 2.7596(7)              |
| Au(01) – Au(03) | 2.7596(7)              |
| Au(01) – Au(04) | 2.7790(8)              |
| Au(01) – Au(04) | 2.7790(8)              |
| Au(01) – Au(2A) | 2.7923(7)              |
| Au(01) – Au(2A) | 2.7923(7)              |
| Au(01) – Au(07) | 2.7934(8)              |
| Au(01) – Au(07) | 2.7934(8)              |
| Au(01) – Au(05) | 2.8106(7)              |
| Au(01) – Au(05) | 2.8107(7)              |
| Au(2A) – Au(03) | 2.8113(11)             |
| Au(2A) – Au(07) | 2.9068(12)             |
| Au(2A) – Au(6A) | 2.9334(11)             |
| Au(2A) – Au(04) | 2.9498(11)             |
| Au(2A) – Au(05) | 2.9873(11)             |
| Au(2A) – Au(10) | 3.0754(12)             |
| Au(2A) – Au(09) | 3.1011(11)             |
| Au(2A) – Au(11) | 3.1864(11)             |
| Au(6A) – Au(05) | 2.8110(10)             |
| Au(6A) – Au(07) | 2.9563(11)             |
| Au(6A) – Au(04) | 2.9639(11)             |
| Au(6A) – Au(03) | 2.9825(11)             |
| Au(6A) – Au(3C) | 3.0368(11)             |
| Au(6A) – Au(10) | 3.0762(11)             |
| Au(6A) – Au(13) | 3.1576(11)             |
| Au(3C) – Au(05) | 3.1574(11)             |
| Au(3C) – Au(07) | 3.1819(11)             |
| Au(2B) – Au(10) | 2.20(5)                |
| Au(2B) – Au(6B) | 2.50(5)                |
| Au(2B) – Au(03) | 2.55(4)                |
| Au(2B) – Au(09) | 3.11(4)                |
| Au(2B) – Au(04) | 3.29(4)                |
| Au(6B) – Au(13) | 2.46(4)                |
| Au(6B) – Au(04) | 2.51(4)                |
| Au(6B) – Au(3D) | 2.75(6)                |
| Au(6B) – Au(05) | 3.14(4)                |
| Au(6B) – Au(10) | 3.21(4)                |
| Au(3D) – Au(05) | 2.23(4)                |

---

|                 |            |
|-----------------|------------|
| Au(3D) – Au(07) | 2.60(4)    |
| Au(3D) – Au(13) | 3.06(4)    |
| Au(03) – Au(04) | 2.8924(11) |
| Au(03) – Au(05) | 2.9065(11) |
| Au(03) – Au(07) | 3.0674(11) |
| Au(03) – Au(09) | 3.1089(11) |
| Au(03) – Au(08) | 3.1211(11) |
| Au(03) – Au(10) | 3.1220(11) |
| Au(04) – Au(07) | 2.8334(11) |
| Au(04) – Au(05) | 2.9886(11) |
| Au(04) – Au(11) | 3.0933(11) |
| Au(04) – Au(13) | 3.1515(11) |
| Au(04) – Au(08) | 3.1746(11) |
| Au(05) – Au(07) | 2.8910(11) |
| Au(05) – Au(13) | 3.0976(11) |
| Au(05) – Au(09) | 3.1894(11) |
| Au(07) – Au(08) | 3.0335(11) |
| Au(07) – Au(11) | 3.1132(11) |
| Au(6A) – S(01)  | 2.410(5)   |
| Au(3C) – S(06)  | 2.298(6)   |
| Au(3C) – S(03)  | 2.316(6)   |
| Au(2B) – S(08)  | 2.51(4)    |
| Au(6B) – S(01)  | 2.24(4)    |
| Au(3D) – S(06)  | 2.53(4)    |
| Au(3D) – S(03)  | 2.66(4)    |
| Au(3D) – S(02)  | 2.412(5)   |
| Au(04) – S(09)  | 2.385(5)   |
| Au(05) – S(04)  | 2.396(5)   |
| Au(07) – S(03)  | 2.415(5)   |
| Au(08) – S(05)  | 2.319(5)   |
| Au(08) – S(02)  | 2.332(5)   |
| Au(09) – S(07)  | 2.304(6)   |
| Au(09) – S(04)  | 2.312(6)   |
| Au(10) – S(07)  | 2.297(5)   |
| Au(10) – S(01)  | 2.318(5)   |
| Au(11) – S(08)  | 2.289(6)   |
| Au(11) – S(05)  | 2.311(5)   |
| Au(13) – S(06)  | 2.294(6)   |
| Au(13) – S(09)  | 2.317(6)   |

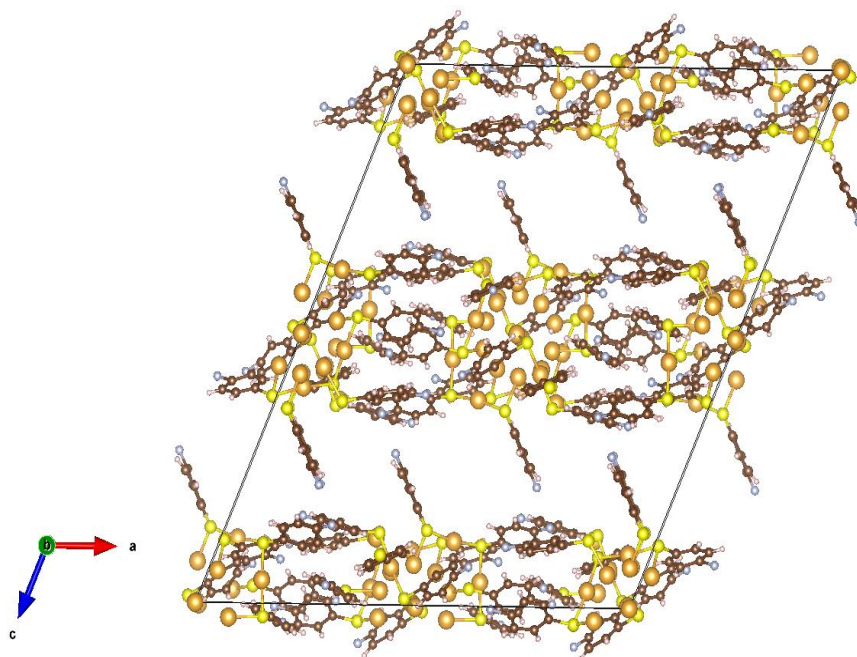

**Figure S6.** Relaxed structure of the  $[\text{Au}_{25}(\text{XBT})_{18}]^{-}$  NCs, X = F, Cl, Br. Color legend: Golden yellow, Au; yellow, S; Blue, F, Cl, Br; Brown, C.

**Table S3.** Electronic properties of the  $[\text{Au}_{25}(\text{XBT})_{18}]^-$  NCs, X = F, Cl, Br.

|                                |                                                                         |                                                                          |                                                                          |
|--------------------------------|-------------------------------------------------------------------------|--------------------------------------------------------------------------|--------------------------------------------------------------------------|
| Lattice vectors                | a= 29.899<br>b= 17.874<br>c= 35.269                                     | a= 29.899<br>b= 17.874<br>c= 35.269                                      | a= 29.899<br>b= 17.874<br>c= 35.269                                      |
| Chemical Formula               | $\text{Au}_{100}\text{S}_{72}\text{C}_{432}\text{H}_{288}\text{F}_{72}$ | $\text{Au}_{100}\text{S}_{72}\text{C}_{432}\text{H}_{288}\text{Cl}_{72}$ | $\text{Au}_{100}\text{S}_{72}\text{C}_{432}\text{H}_{288}\text{Br}_{72}$ |
| Number of Atoms                | 964                                                                     | 964                                                                      | 964                                                                      |
| Total Energy (eV)              | -54996566.84262                                                         | -55706315.966422088                                                      | -59941358.851653107                                                      |
| Fermi Energy (eV)              | -5.72342                                                                | -5.54215765                                                              | -5.48438                                                                 |
| Highest occupied state (eV)    | -5.72342                                                                | -5.55704335                                                              | -5.492457                                                                |
| Lowest unoccupied state (eV)   | -4.36278                                                                | -4.20388263                                                              | -4.16609                                                                 |
| Estimated HOMO-LUMO gap (eV)   | 1.37640                                                                 | 1.35316072                                                               | 1.32630                                                                  |
| Cell Volume ( $\text{\AA}^3$ ) | 17252.96791                                                             | 17252.96791                                                              | 17252.96791                                                              |



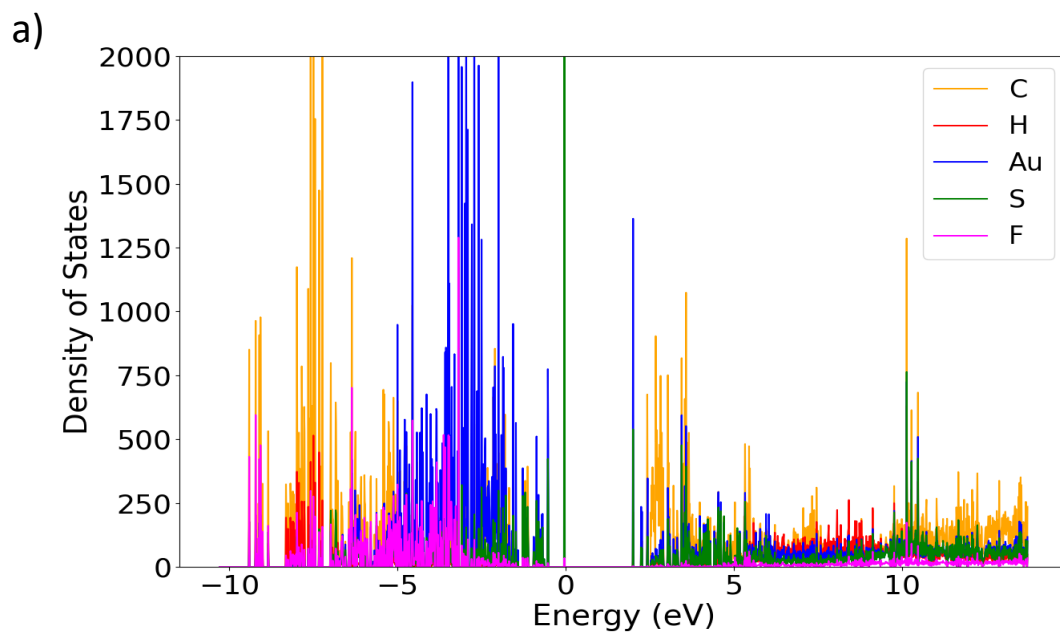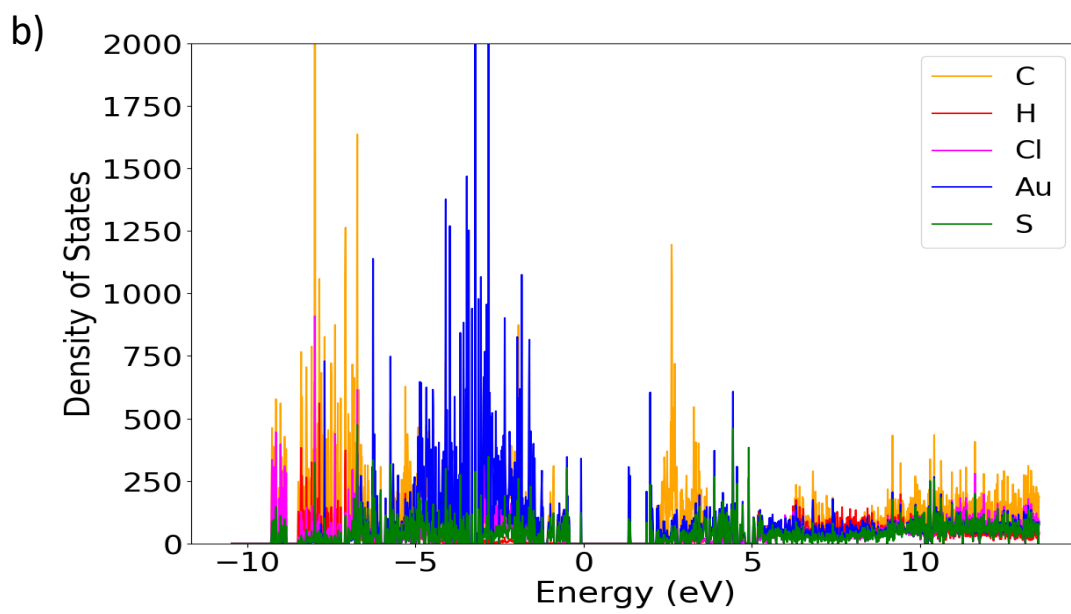

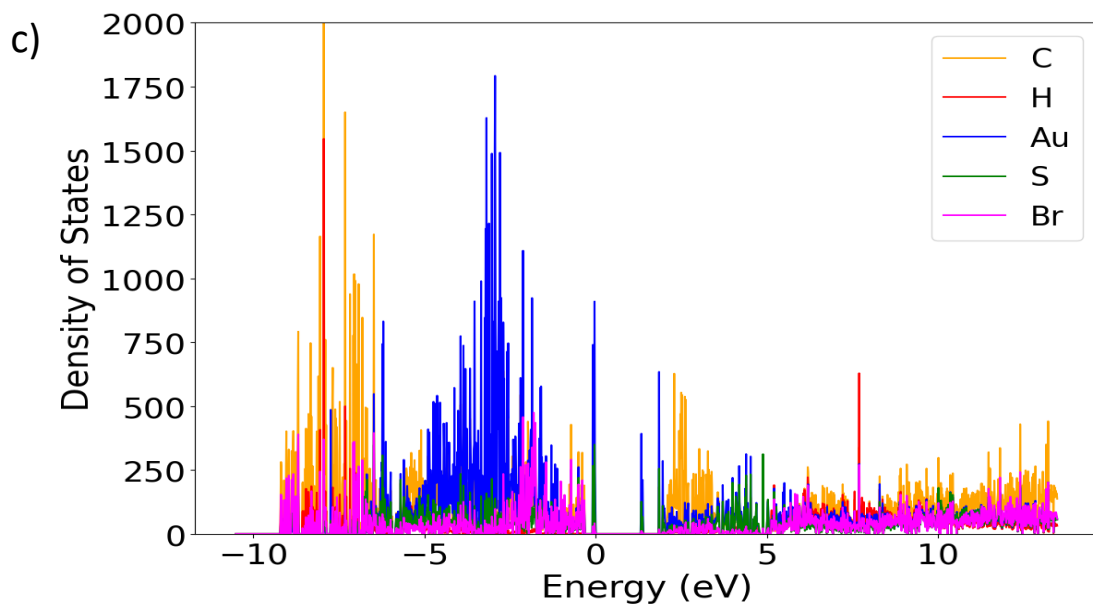

**Figure S7.** Density of states of the a)  $[\text{Au}_{25}(\text{FBT})_{18}]^{-}$ , b)  $[\text{Au}_{25}(\text{CBT})_{18}]^{-}$ , c)  $[\text{Au}_{25}(\text{BBT})_{18}]^{-}$  NCs.

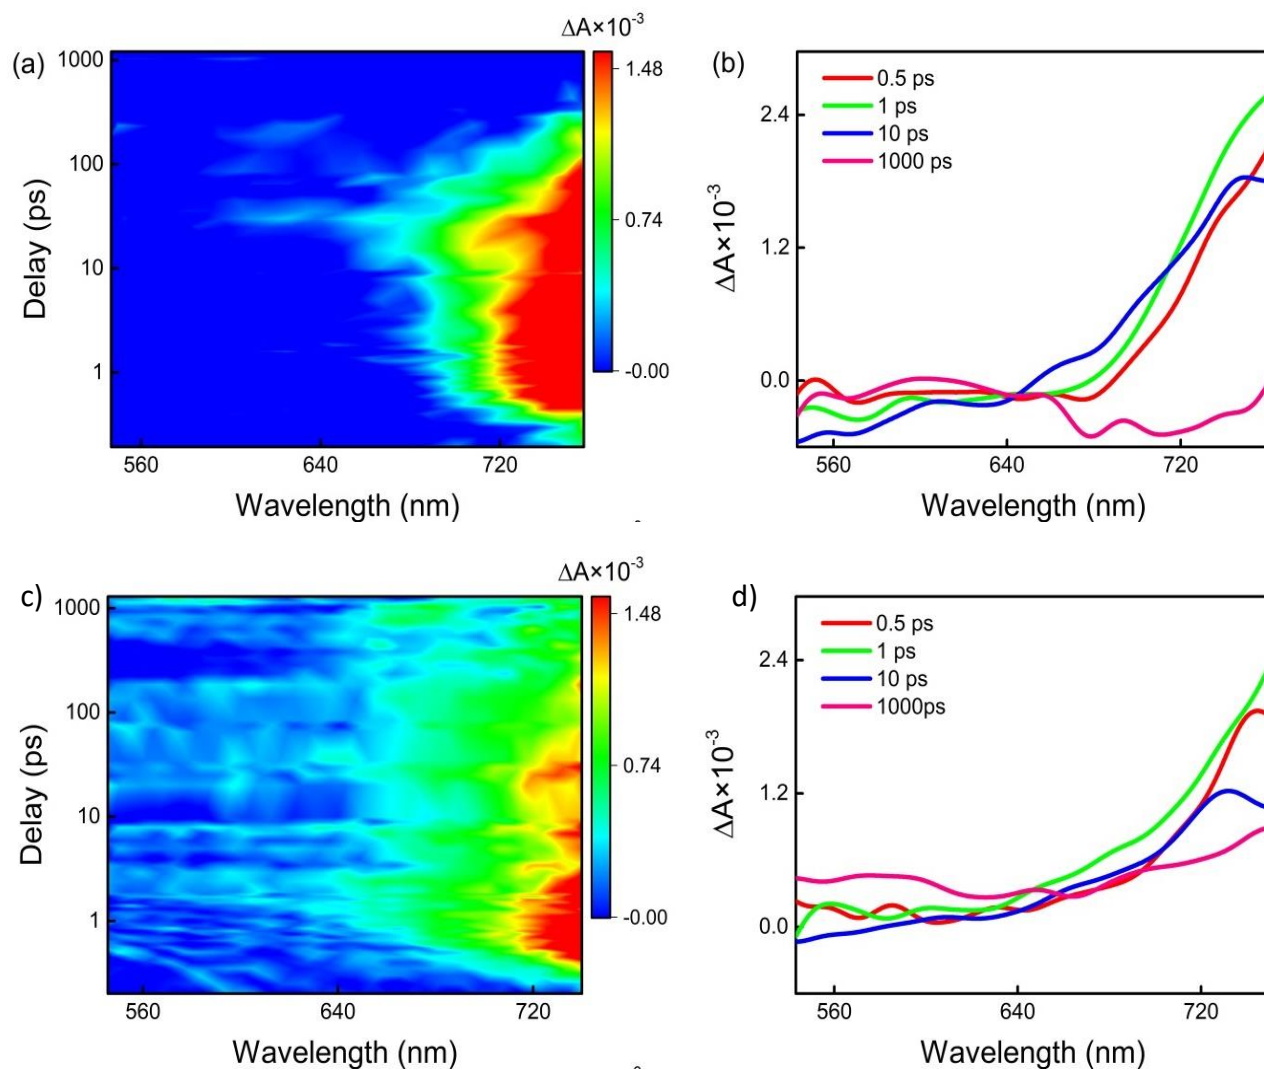

**Figure S8.** Contour plot illustrating the ultrafast transient absorption spectrum of (a)  $[\text{Au}_{23}(\text{S-c-C}_6\text{H}_{11})_{16}]^-$  NC and (c)  $\text{Au}_{23}(\text{S-c-C}_6\text{H}_{11})_{17}$  NCs dissolved in dichloromethane (DCM), with (b & d) corresponding cross-sections of the contour plot at selected probe delay times. The excitation wavelength is 400 nm, and the excitation fluence is 490 nJ/cm<sup>2</sup>.

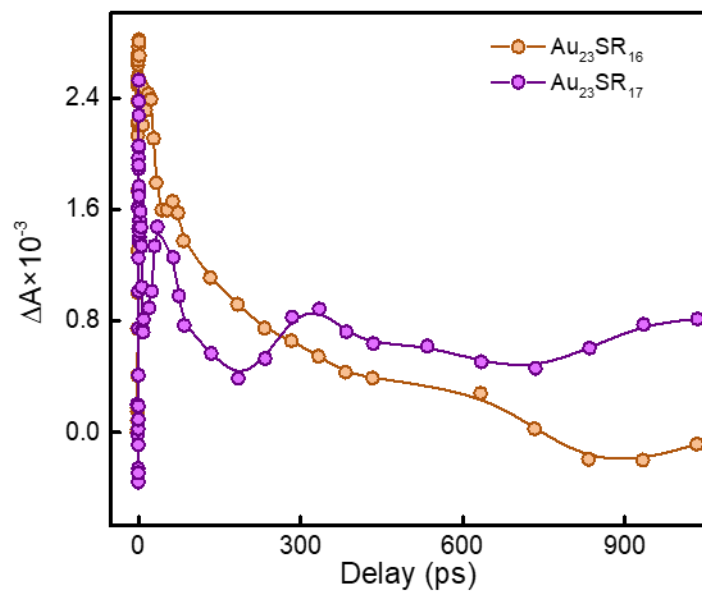

**Figure S9.** TA decay kinetics of the  $[\text{Au}_{23}(\text{S}-c\text{-C}_6\text{H}_{11})_{16}]^-$  and the  $\text{Au}_{23}(\text{S}-c\text{-C}_6\text{H}_{11})_{17}$  species at 750 nm.

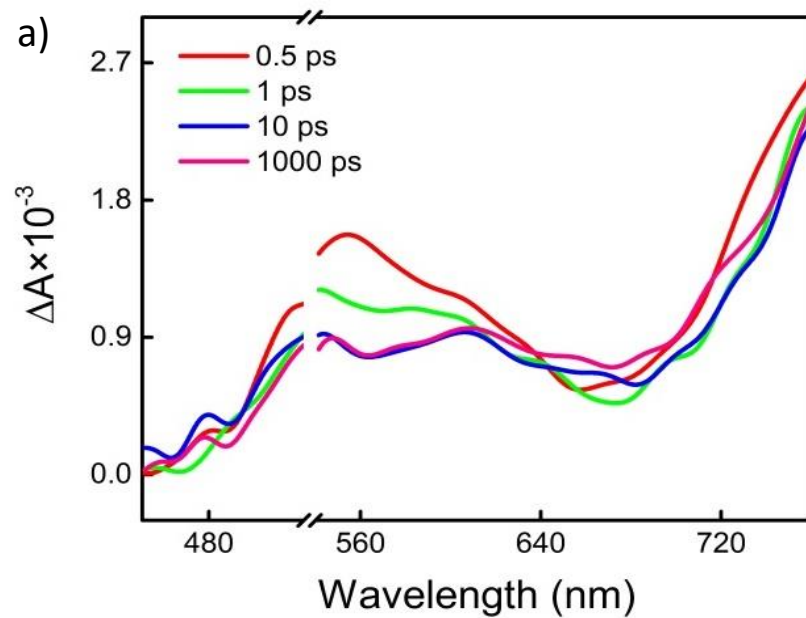

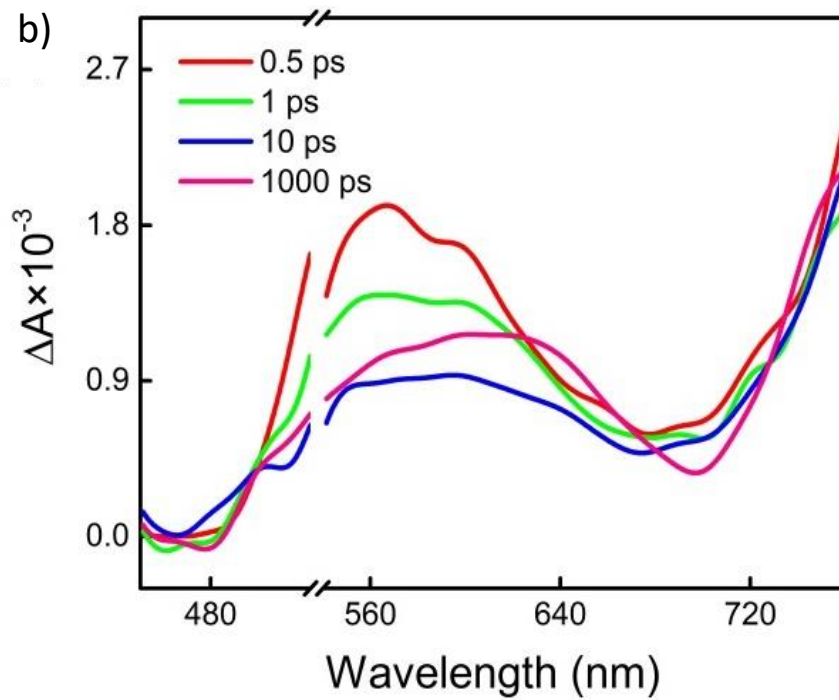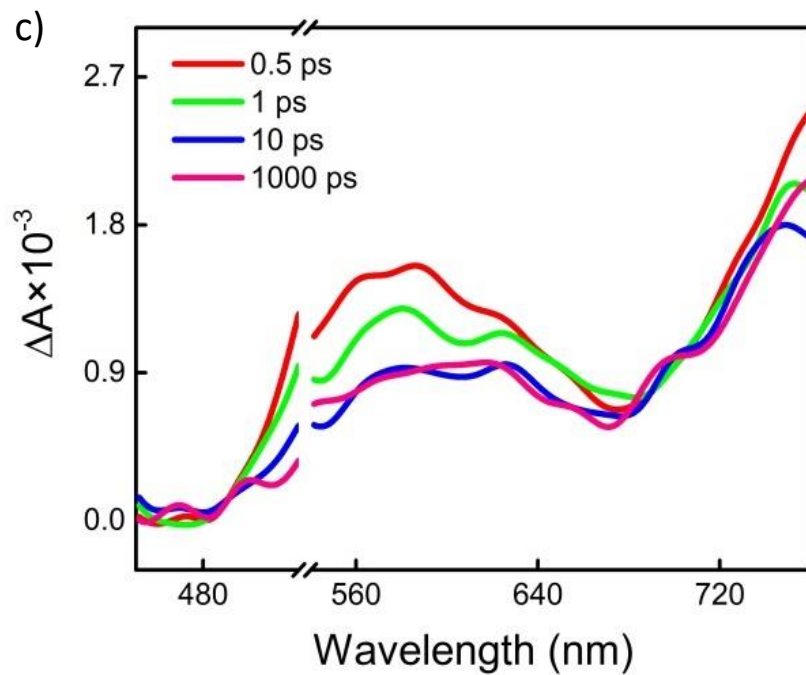

**Figure S10.** The time-associated femtosecond transient absorption spectra of the a)  $[\text{Au}_{25}(\text{FBT})_{18}]^{-}$ , b)  $[\text{Au}_{25}(\text{CBT})_{18}]^{-}$ , c)  $[\text{Au}_{25}(\text{BBT})_{18}]^{-}$  NCs at different delay times.

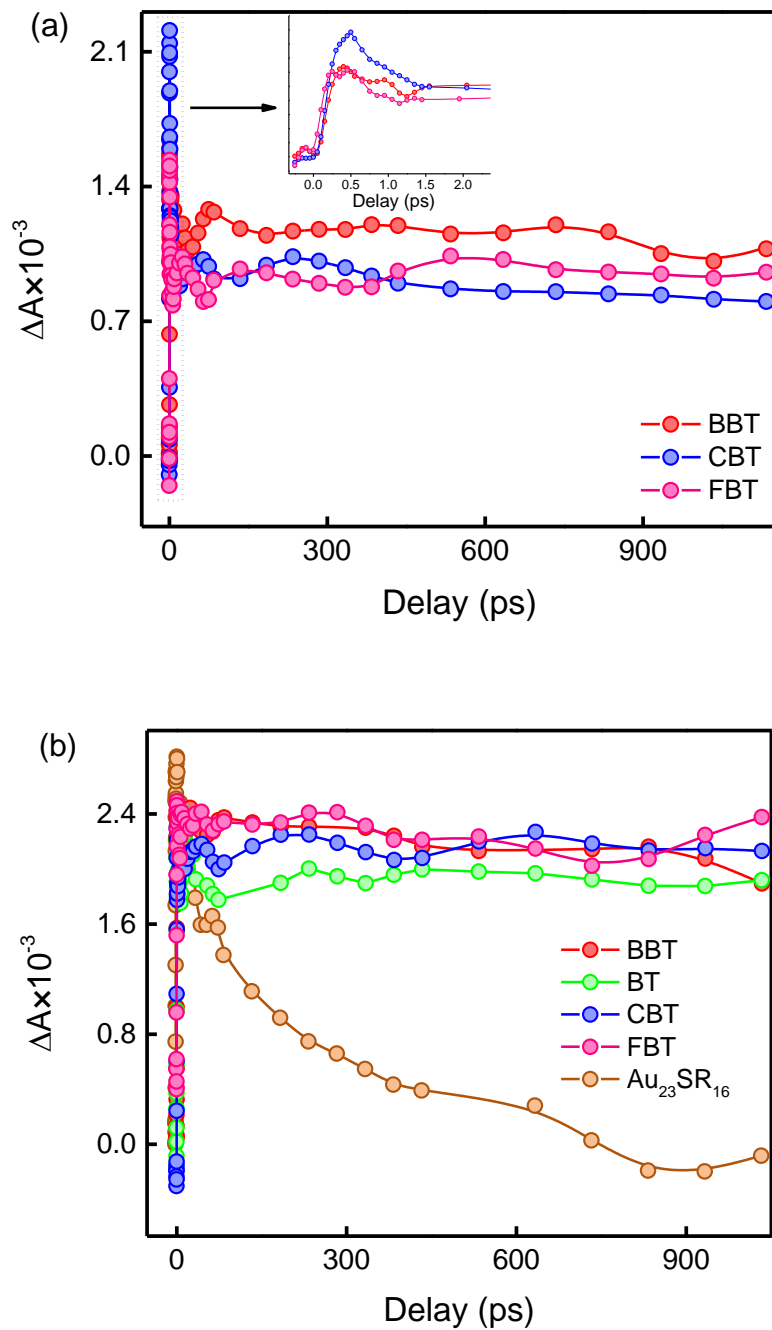

**Figure S11.** TA decay kinetics of the  $[\text{Au}_{25}(\text{XBT})_{18}]$  NCs at (a) 560 nm. TA decay kinetics of the  $[\text{Au}_{25}(\text{XBT})_{18}]$  NCs and the  $[\text{Au}_{23}(\text{S}-c\text{-C}_6\text{H}_{11})_{16}]$  at (b) 750 nm. Inset of (a) shows the early time decay feature of PIA.

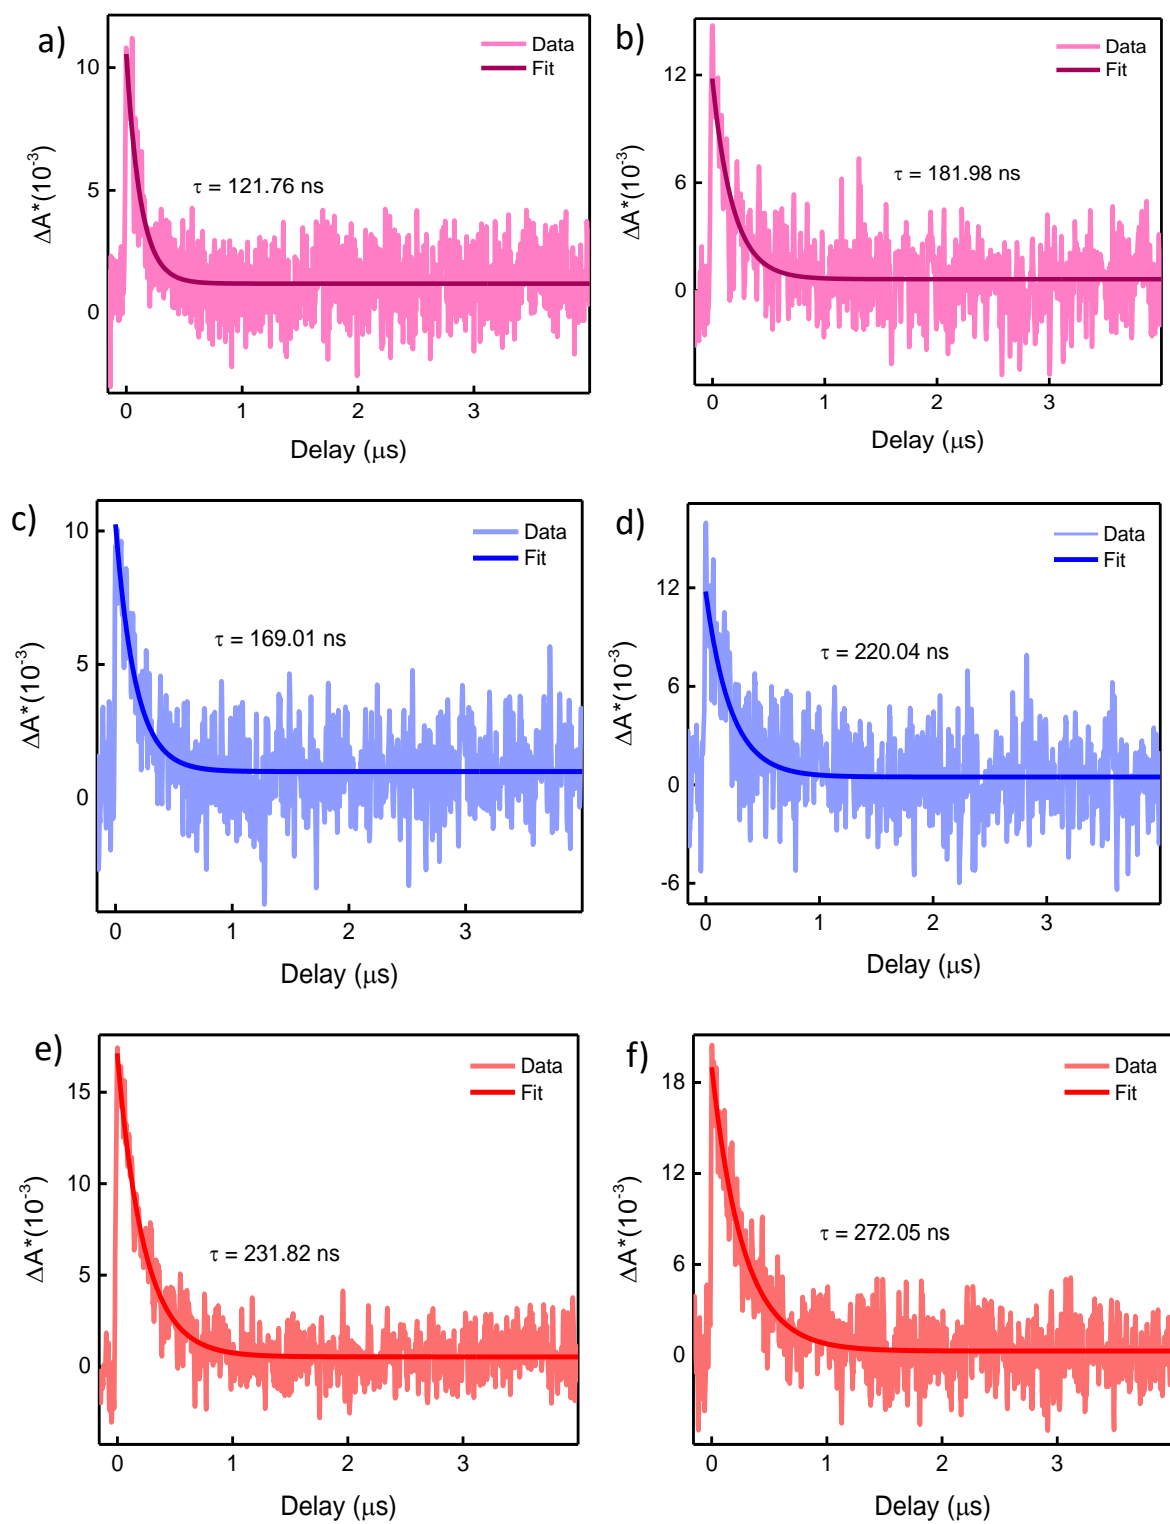

**Figure S12.** Nanosecond transient absorption decay kinetics of a), b) [Au<sub>25</sub>(FBT)<sub>18</sub>]<sup>-</sup> NC; c), d) [Au<sub>25</sub>(CBT)<sub>18</sub>]<sup>-</sup> NC; e), f) [Au<sub>25</sub>(BBT)<sub>18</sub>]<sup>-</sup> NCs at 560 nm and 750 nm wavelength, respectively.

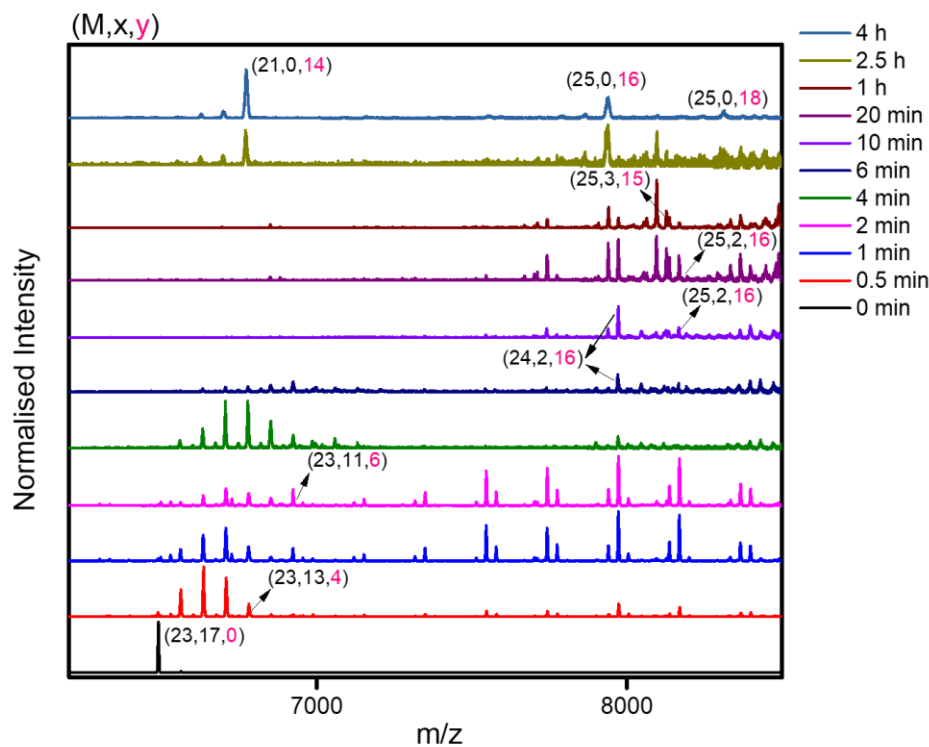

**Figure S13 a.** Time-dependent MALDI-MS spectra of the aliquots taken during the transformation reaction of  $\text{Au}_{23}(\text{S-}i\text{-C}_6\text{H}_{11})_{17}$  intermediate species with BBT. ( $M$  = number of metal atoms,  $x$  = number of cyclohexanethiolate ligands,  $y$  = number of bromobenzenethiolate ligands in each species).

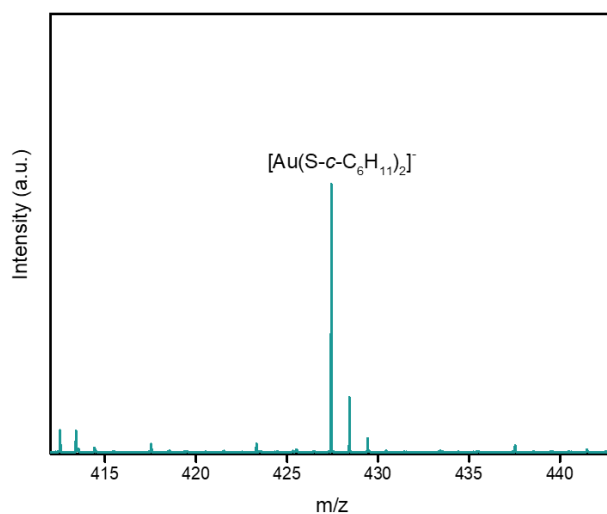

**Figure S13 b.** Negative mode ESI-MS spectrum of the  $[\text{Au}_{23}(\text{S-}i\text{-C}_6\text{H}_{11})_{16}]^-$  nanoclusters at low range showing the presence of  $\text{Au}(\text{S-}i\text{-C}_6\text{H}_{11})_2$  complex.



**Table S4.** Optimized structure coordinates of a)  $[\text{Au}_{23}(\text{SC}_6\text{H}_{11})_{16}]^-$  NC, b)  $\text{Au}_{23}(\text{SC}_6\text{H}_{11})_{17}$ , c)  $\text{Au}_{23}(\text{SC}_6\text{H}_{11})_{11}(\text{BBT})_6$ , d)  $\text{Au}_{24}(\text{SC}_6\text{H}_{11})_2(\text{BBT})_{16}$ , e)  $\text{Au}_{25}(\text{SC}_6\text{H}_{11})_2(\text{BBT})_{16}$  and f)  $[\text{Au}_{25}(\text{BBT})_{18}]^-$  NCs.

**a)  $\text{Au}_{23}(\text{S-c-C}_6\text{H}_{11})_{16}$**

|    |              |              |              |
|----|--------------|--------------|--------------|
| Au | 15.318386151 | 14.859476536 | 15.025961020 |
| Au | 14.447284570 | 12.224959686 | 14.863527453 |
| Au | 15.967930274 | 17.601810981 | 14.917166678 |
| Au | 16.504536438 | 13.074043281 | 13.249575970 |
| Au | 13.998098032 | 16.733273335 | 16.597286586 |
| Au | 17.968017113 | 15.684234418 | 16.134212154 |
| Au | 12.362642886 | 14.044246017 | 13.551292102 |
| Au | 12.786353950 | 14.090446579 | 16.318446428 |
| Au | 17.700752324 | 15.729175244 | 13.434698520 |
| Au | 16.879185930 | 12.811254568 | 16.001980282 |
| Au | 13.580341428 | 16.666370187 | 13.830798521 |
| Au | 15.429488818 | 15.094197671 | 18.458073653 |
| Au | 15.000455134 | 14.862316658 | 11.444304342 |
| Au | 19.825749147 | 13.358722911 | 17.695943094 |
| Au | 10.443568741 | 16.179727663 | 12.263315010 |
| Au | 19.482551714 | 14.038997815 | 14.634655080 |
| Au | 10.875717161 | 15.618687022 | 15.122520106 |
| Au | 19.239272012 | 11.814118125 | 12.720858675 |
| Au | 11.302598878 | 17.872422035 | 17.057834856 |
| Au | 19.164315297 | 18.296354055 | 14.195912140 |
| Au | 11.107849880 | 11.734659456 | 15.606409317 |
| Au | 21.166843754 | 16.105834297 | 15.894804183 |
| Au | 8.830324843  | 13.714775179 | 14.271935772 |
| S  | 17.523907108 | 16.082252351 | 18.422192469 |
| S  | 13.424807365 | 13.161670057 | 11.611911046 |
| S  | 18.351040772 | 11.598814523 | 17.377324218 |

---

|   |              |              |              |
|---|--------------|--------------|--------------|
| S | 12.338081544 | 17.498396491 | 11.988997675 |
| S | 17.262203974 | 19.548524719 | 14.625625915 |
| S | 12.852901209 | 10.497731784 | 14.716629860 |
| S | 13.522061320 | 13.768658730 | 18.565539219 |
| S | 16.630024893 | 16.520081110 | 11.442307308 |
| S | 17.367965599 | 11.801881595 | 11.382049175 |
| S | 13.333682025 | 18.898926720 | 17.468372485 |
| S | 20.914988455 | 12.132449710 | 14.280030496 |
| S | 9.346671870  | 16.730146682 | 16.612536713 |
| S | 21.220537279 | 15.187463995 | 18.028672735 |
| S | 8.660571148  | 14.674771048 | 12.178237961 |
| S | 21.141187193 | 17.160468058 | 13.812510888 |
| S | 9.114384478  | 12.696282496 | 16.340800728 |
| C | 22.909808260 | 14.521405653 | 18.444388051 |
| C | 23.549025209 | 13.590332412 | 17.404450358 |
| C | 24.219418057 | 14.325168786 | 16.240002187 |
| C | 25.184682976 | 15.412795232 | 16.720781609 |
| C | 24.469288917 | 16.399524386 | 17.648767301 |
| C | 23.848434777 | 15.671726805 | 18.845619878 |
| C | 22.424048298 | 12.652374423 | 13.362591740 |
| C | 22.193824582 | 13.770548710 | 12.347951093 |
| C | 23.512653066 | 14.169491246 | 11.675191306 |
| C | 24.193534165 | 12.964042911 | 11.017686660 |
| C | 24.396268359 | 11.824174340 | 12.023326206 |
| C | 23.078157741 | 11.430986640 | 12.707158045 |
| C | 22.477146354 | 18.441354895 | 13.876305327 |
| C | 22.292242090 | 19.444779838 | 12.735547088 |
| C | 23.434519602 | 20.470641334 | 12.724518283 |
| C | 24.806710974 | 19.789807072 | 12.654223718 |
| C | 24.979318756 | 18.766058517 | 13.782621237 |

---

|   |              |              |              |
|---|--------------|--------------|--------------|
| C | 23.835805605 | 17.742981967 | 13.788367406 |
| C | 17.890024449 | 16.229823201 | 10.105322856 |
| C | 18.127783359 | 17.570751107 | 9.400453655  |
| C | 19.178932416 | 17.426210077 | 8.290952669  |
| C | 18.790622336 | 16.326884798 | 7.295745431  |
| C | 18.548621623 | 14.993688261 | 8.012192031  |
| C | 17.495919488 | 15.130065146 | 9.122044929  |
| C | 16.733457820 | 20.173169534 | 12.967912969 |
| C | 17.802525587 | 21.106034318 | 12.392656033 |
| C | 17.347648900 | 21.695055902 | 11.050610532 |
| C | 15.998534040 | 22.409378148 | 11.182356166 |
| C | 14.935493534 | 21.472312373 | 11.766322612 |
| C | 15.381630463 | 20.877831321 | 13.109655696 |
| C | 11.891930912 | 19.249064369 | 12.330255855 |
| C | 11.444808830 | 19.522030064 | 13.762564903 |
| C | 11.151412176 | 21.012407531 | 13.970666365 |
| C | 10.131300321 | 21.535277064 | 12.952662304 |
| C | 10.568992726 | 21.235003027 | 11.515009806 |
| C | 10.856150119 | 19.739655628 | 11.314436096 |
| C | 8.218844553  | 17.823132058 | 15.629059525 |
| C | 8.202243128  | 19.253033668 | 16.174702338 |
| C | 7.183262989  | 20.121195308 | 15.425792810 |
| C | 5.781709416  | 19.505280983 | 15.468754544 |
| C | 5.801776604  | 18.075484211 | 14.920314040 |
| C | 6.820791811  | 17.195157821 | 15.658140041 |
| C | 7.105082508  | 15.666018908 | 12.117568225 |
| C | 5.901941980  | 14.733488028 | 12.284049751 |
| C | 4.581828125  | 15.503906115 | 12.145193978 |
| C | 4.517887537  | 16.278796777 | 10.824298666 |
| C | 5.728971052  | 17.204963394 | 10.663855597 |

---

|   |              |              |              |
|---|--------------|--------------|--------------|
| C | 7.048627992  | 16.431118175 | 10.791944111 |
| C | 7.965448811  | 11.245749727 | 16.422820653 |
| C | 6.516336116  | 11.736383557 | 16.466242677 |
| C | 5.544959556  | 10.558259127 | 16.628969823 |
| C | 5.886426915  | 9.711757212  | 17.860682436 |
| C | 7.341396298  | 9.231562071  | 17.814818322 |
| C | 8.314852603  | 10.407797264 | 17.657436320 |
| C | 12.335412729 | 14.765263016 | 19.580102060 |
| C | 12.754057757 | 14.709920192 | 21.051717818 |
| C | 11.759787045 | 15.476061178 | 21.937467839 |
| C | 10.318763028 | 14.997307783 | 21.725068593 |
| C | 9.928458652  | 15.050791928 | 20.243984801 |
| C | 10.909771457 | 14.257092452 | 19.372991262 |
| C | 13.466220449 | 19.227607836 | 19.292266823 |
| C | 12.149072382 | 19.033756538 | 20.045609014 |
| C | 12.279206508 | 19.440951890 | 21.520154337 |
| C | 12.765768928 | 20.887010501 | 21.656671351 |
| C | 14.089078283 | 21.084588538 | 20.911476249 |
| C | 13.974175557 | 20.669011630 | 19.437723830 |
| C | 17.474593615 | 11.245786937 | 18.972314753 |
| C | 17.351107667 | 12.442053825 | 19.908374976 |
| C | 16.585888261 | 12.065132143 | 21.181577699 |
| C | 17.251449761 | 10.884502489 | 21.897942876 |
| C | 17.417860628 | 9.685994721  | 20.956341603 |
| C | 18.164707625 | 10.067950527 | 19.668481200 |
| C | 16.659271598 | 10.091556774 | 11.431563017 |
| C | 15.298581942 | 10.101598208 | 10.729635572 |
| C | 14.703392137 | 8.688469668  | 10.663758705 |
| C | 14.597583591 | 8.065650624  | 12.060000759 |
| C | 15.956167352 | 8.071885251  | 12.771088797 |

---

|   |              |              |              |
|---|--------------|--------------|--------------|
| C | 16.559669534 | 9.482648496  | 12.830293016 |
| C | 13.352733479 | 9.253346811  | 15.982302416 |
| C | 12.231567340 | 8.227209217  | 16.172750629 |
| C | 12.654011937 | 7.130860823  | 17.160856937 |
| C | 13.107742481 | 7.725624487  | 18.499264675 |
| C | 14.217680566 | 8.763982742  | 18.298852951 |
| C | 13.792139262 | 9.860704383  | 17.315273473 |
| C | 12.348510863 | 13.065061950 | 10.118961410 |
| C | 11.968731021 | 14.407378995 | 9.505271933  |
| C | 11.065818272 | 14.222983269 | 8.278677568  |
| C | 9.831149697  | 13.376642857 | 8.611489637  |
| C | 10.228441591 | 12.027643186 | 9.221929546  |
| C | 11.121821830 | 12.212999045 | 10.456234453 |
| C | 17.476498616 | 17.908071176 | 18.690167625 |
| C | 18.769828053 | 18.499768978 | 18.120887467 |
| C | 18.899072946 | 19.990534966 | 18.443727456 |
| C | 18.826613360 | 20.232505896 | 19.953897672 |
| C | 17.524165386 | 19.664455177 | 20.523362210 |
| C | 17.353715087 | 18.173942750 | 20.194965649 |
| H | 22.669611477 | 13.931098043 | 19.341275709 |
| H | 22.799230732 | 12.873633617 | 17.035919443 |
| H | 24.316503651 | 13.000395246 | 17.938644733 |
| H | 24.744547361 | 13.597735723 | 15.600908733 |
| H | 23.439618307 | 14.792622763 | 15.610452614 |
| H | 25.623043305 | 15.940731883 | 15.859040423 |
| H | 26.027995825 | 14.947267070 | 17.262920163 |
| H | 25.165088781 | 17.174802212 | 18.005469192 |
| H | 23.676304653 | 16.922231961 | 17.084016960 |
| H | 23.317220772 | 16.376827502 | 19.502298225 |
| H | 24.661325123 | 15.229020058 | 19.449682240 |

---

|   |              |              |              |
|---|--------------|--------------|--------------|
| H | 23.085841449 | 13.027176278 | 14.159920486 |
| H | 21.731298214 | 14.637085300 | 12.841518237 |
| H | 21.471944442 | 13.414953316 | 11.591056583 |
| H | 23.325672851 | 14.962984399 | 10.934588281 |
| H | 24.188536113 | 14.603231372 | 12.434239026 |
| H | 25.158439809 | 13.258842234 | 10.575842042 |
| H | 23.562504434 | 12.603471052 | 10.186466748 |
| H | 24.834380960 | 10.943875208 | 11.526918540 |
| H | 25.122721044 | 12.143126320 | 12.792487079 |
| H | 23.248795166 | 10.641348207 | 13.454730614 |
| H | 22.374538875 | 11.018727549 | 11.962947748 |
| H | 22.384118382 | 18.958540955 | 14.843476733 |
| H | 21.316586557 | 19.945638105 | 12.836437067 |
| H | 22.271992189 | 18.895443781 | 11.777427581 |
| H | 23.303330842 | 21.161634452 | 11.877396147 |
| H | 23.377200622 | 21.084036273 | 13.640895042 |
| H | 25.608505867 | 20.543344134 | 12.693564185 |
| H | 24.905758295 | 19.274905006 | 11.682123640 |
| H | 25.944195876 | 18.243646430 | 13.686288378 |
| H | 25.002864005 | 19.289878296 | 14.754556697 |
| H | 23.945946360 | 17.037944584 | 14.625118144 |
| H | 23.867385190 | 17.143784374 | 12.861450449 |
| H | 18.811087611 | 15.931654106 | 10.630083705 |
| H | 18.438704546 | 18.331093075 | 10.134287716 |
| H | 17.173015474 | 17.917543910 | 8.967115495  |
| H | 19.310984807 | 18.390199509 | 7.774433401  |
| H | 20.153723673 | 17.177831078 | 8.746962472  |
| H | 19.570615629 | 16.214215555 | 6.526635314  |
| H | 17.868799411 | 16.627469603 | 6.766814766  |
| H | 18.231618721 | 14.219669308 | 7.296191552  |

---

|   |              |              |              |
|---|--------------|--------------|--------------|
| H | 19.495987995 | 14.639631412 | 8.456062464  |
| H | 17.371778652 | 14.177454227 | 9.657491633  |
| H | 16.514477785 | 15.378730814 | 8.681533385  |
| H | 16.623226369 | 19.289646131 | 12.318784849 |
| H | 18.748164777 | 20.553558539 | 12.277179105 |
| H | 17.996231661 | 21.920811240 | 13.112294900 |
| H | 18.115969709 | 22.385309255 | 10.668824099 |
| H | 17.258483962 | 20.880774621 | 10.309992730 |
| H | 15.671843177 | 22.796001926 | 10.204575717 |
| H | 16.114155881 | 23.285197799 | 11.845444280 |
| H | 13.980453969 | 22.006354315 | 11.894825176 |
| H | 14.743769838 | 20.652561010 | 11.051342734 |
| H | 14.637293742 | 20.164329202 | 13.496544675 |
| H | 15.469954875 | 21.682765481 | 13.860124607 |
| H | 12.844113157 | 19.773005091 | 12.146989937 |
| H | 12.212933145 | 19.173621554 | 14.468936038 |
| H | 10.542211619 | 18.920360897 | 13.967420832 |
| H | 10.796104327 | 21.177040946 | 14.999868907 |
| H | 12.092409198 | 21.582186982 | 13.874898669 |
| H | 9.973707523  | 22.616559956 | 13.087259651 |
| H | 9.156619762  | 21.051552485 | 13.138789523 |
| H | 9.799617698  | 21.564996628 | 10.799612461 |
| H | 11.481040629 | 21.812092271 | 11.281699690 |
| H | 11.204799778 | 19.542636405 | 10.289481714 |
| H | 9.928650775  | 19.155044916 | 11.453581059 |
| H | 8.600075903  | 17.825572751 | 14.594586912 |
| H | 9.212848928  | 19.683436196 | 16.106160658 |
| H | 7.949112102  | 19.220586696 | 17.248654242 |
| H | 7.178047314  | 21.138085416 | 15.848082995 |
| H | 7.499582442  | 20.222785505 | 14.372791280 |

---

|   |              |              |              |
|---|--------------|--------------|--------------|
| H | 5.073515838  | 20.122816331 | 14.894677673 |
| H | 5.418312682  | 19.493968710 | 16.511199253 |
| H | 4.801547899  | 17.618923599 | 14.983461262 |
| H | 6.059408542  | 18.111908557 | 13.847251087 |
| H | 6.857042569  | 16.181772362 | 15.226338102 |
| H | 6.509558013  | 17.073900006 | 16.710054693 |
| H | 7.140615308  | 16.378526347 | 12.952952370 |
| H | 5.960292604  | 14.226141553 | 13.259847489 |
| H | 5.956185664  | 13.944410880 | 11.513506192 |
| H | 3.736252138  | 14.803244335 | 12.223434872 |
| H | 4.482951149  | 16.209380529 | 12.987588384 |
| H | 3.583218395  | 16.857820130 | 10.766386577 |
| H | 4.497116099  | 15.562477079 | 9.983987091  |
| H | 5.695420757  | 17.720548047 | 9.691651701  |
| H | 5.691695321  | 17.993007409 | 11.436779611 |
| H | 7.912248142  | 17.110615131 | 10.718506798 |
| H | 7.139814809  | 15.711343318 | 9.959681105  |
| H | 8.127636200  | 10.648847903 | 15.512558951 |
| H | 6.292708959  | 12.306429958 | 15.550986202 |
| H | 6.400437789  | 12.435152622 | 17.313386886 |
| H | 4.511985215  | 10.934383820 | 16.691938445 |
| H | 5.592135452  | 9.922552376  | 15.727289930 |
| H | 5.201562813  | 8.852908002  | 17.936400091 |
| H | 5.733335252  | 10.317499957 | 18.771530845 |
| H | 7.590706714  | 8.661481670  | 18.723252335 |
| H | 7.470412675  | 8.538704966  | 16.964767471 |
| H | 9.353607284  | 10.050068797 | 17.580747572 |
| H | 8.267032263  | 11.053833806 | 18.551993471 |
| H | 12.401891113 | 15.798652212 | 19.206104930 |
| H | 13.771175830 | 15.116577616 | 21.165487898 |



---

|   |              |              |              |
|---|--------------|--------------|--------------|
| H | 12.797544213 | 13.653550111 | 21.369399710 |
| H | 12.051178903 | 15.371869318 | 22.994404720 |
| H | 11.821355158 | 16.551917009 | 21.704037642 |
| H | 9.625012219  | 15.604738241 | 22.327413379 |
| H | 10.223813808 | 13.958460539 | 22.088056722 |
| H | 8.907884069  | 14.667082877 | 20.092593489 |
| H | 9.916646751  | 16.099617717 | 19.899156943 |
| H | 10.633882633 | 14.339477981 | 18.311297605 |
| H | 10.862131638 | 13.183247101 | 19.627568588 |
| H | 14.220409423 | 18.521957860 | 19.676589564 |
| H | 11.817176765 | 17.989206541 | 19.954480580 |
| H | 11.372089442 | 19.649635591 | 19.560783130 |
| H | 11.309370995 | 19.307272308 | 22.024575307 |
| H | 12.991124713 | 18.766189482 | 22.028136133 |
| H | 12.881584589 | 21.156141636 | 22.717940651 |
| H | 12.003633630 | 21.568440960 | 21.238939697 |
| H | 14.420311402 | 22.133174717 | 20.972815499 |
| H | 14.870612947 | 20.481508613 | 21.403851903 |
| H | 14.939877152 | 20.780306282 | 18.921203100 |
| H | 13.266873646 | 21.340147801 | 18.920213438 |
| H | 16.467201235 | 10.936441186 | 18.648460652 |
| H | 16.846017956 | 13.272587699 | 19.388825515 |
| H | 18.362968611 | 12.804189813 | 20.162681462 |
| H | 16.524724735 | 12.940902032 | 21.846614622 |
| H | 15.545829585 | 11.805532808 | 20.914748043 |
| H | 16.670446483 | 10.592803966 | 22.786941558 |
| H | 18.246077957 | 11.199225796 | 22.260344669 |
| H | 17.950178480 | 8.866151309  | 21.463947555 |
| H | 16.421324546 | 9.292329547  | 20.689417594 |
| H | 18.225282734 | 9.205972527  | 18.987029200 |

---

|   |              |              |              |
|---|--------------|--------------|--------------|
| H | 19.201872770 | 10.359926890 | 19.908761095 |
| H | 17.377516541 | 9.504944003  | 10.832198600 |
| H | 15.396937131 | 10.529921295 | 9.719974848  |
| H | 14.620884165 | 10.764844436 | 11.292032201 |
| H | 13.712424948 | 8.728432349  | 10.184014389 |
| H | 15.337935062 | 8.050594641  | 10.022017221 |
| H | 14.204943895 | 7.038481875  | 11.993035683 |
| H | 13.873205916 | 8.647905115  | 12.656102430 |
| H | 15.858795866 | 7.670806195  | 13.793049234 |
| H | 16.651594697 | 7.397574426  | 12.239469795 |
| H | 17.551657478 | 9.468094945  | 13.307428401 |
| H | 15.923897135 | 10.138362840 | 13.451280827 |
| H | 14.219368909 | 8.758982925  | 15.507980422 |
| H | 11.946993740 | 7.790838143  | 15.203251060 |
| H | 11.341092240 | 8.756124738  | 16.557535504 |
| H | 11.819800083 | 6.428039362  | 17.312713345 |
| H | 13.480564064 | 6.544764262  | 16.721838253 |
| H | 13.447554342 | 6.926235400  | 19.176104070 |
| H | 12.245412724 | 8.209891444  | 18.990762575 |
| H | 14.497549801 | 9.220571697  | 19.260915760 |
| H | 15.124600881 | 8.262438252  | 17.915824325 |
| H | 14.611925569 | 10.576738037 | 17.142861130 |
| H | 12.953855282 | 10.445642652 | 17.732213610 |
| H | 12.985432177 | 12.508987113 | 9.407081801  |
| H | 12.877696895 | 14.974595504 | 9.252397244  |
| H | 11.434683318 | 15.002831757 | 10.267622817 |
| H | 10.763290233 | 15.210668604 | 7.896542482  |
| H | 11.637771476 | 13.734982388 | 7.469267950  |
| H | 9.218708270  | 13.222154041 | 7.709128971  |
| H | 9.203424523  | 13.922828079 | 9.335695593  |

---

|   |              |              |              |
|---|--------------|--------------|--------------|
| H | 9.332241637  | 11.451026702 | 9.499561245  |
| H | 10.767636605 | 11.427177619 | 8.467479743  |
| H | 11.437436978 | 11.239819953 | 10.863056827 |
| H | 10.553421892 | 12.717767984 | 11.255307224 |
| H | 16.605946920 | 18.307788903 | 18.146340926 |
| H | 18.803545088 | 18.333850862 | 17.033448567 |
| H | 19.629987674 | 17.950021901 | 18.542087135 |
| H | 19.844057652 | 20.372813015 | 18.027887436 |
| H | 18.088804455 | 20.545148832 | 17.938597205 |
| H | 18.902564301 | 21.307646472 | 20.179492625 |
| H | 19.687716366 | 19.743735720 | 20.443067424 |
| H | 17.475890591 | 19.809521355 | 21.614057050 |
| H | 16.681286762 | 20.229062009 | 20.095345792 |
| H | 16.385475124 | 17.800197114 | 20.564882765 |
| H | 18.133733807 | 17.592452254 | 20.716001335 |

**b) Au<sub>23</sub>(S-c-C<sub>6</sub>H<sub>11</sub>)<sub>17</sub>**

|    |              |              |              |
|----|--------------|--------------|--------------|
| Au | 14.595505462 | 13.611298533 | 15.165907741 |
| Au | 13.258756896 | 11.092075003 | 15.081562088 |
| Au | 15.364255709 | 16.384732751 | 14.915254865 |
| Au | 15.660531938 | 11.777315459 | 13.403761261 |
| Au | 13.358677702 | 15.651443266 | 16.573570024 |
| Au | 17.283436706 | 14.472883102 | 16.248306584 |
| Au | 11.512295332 | 12.899694651 | 13.753593917 |
| Au | 11.958230549 | 13.124052091 | 16.536409238 |
| Au | 16.942635555 | 14.375278175 | 13.504540594 |
| Au | 16.540248273 | 11.774966985 | 16.075611283 |
| Au | 13.004607662 | 15.369012763 | 13.806576807 |
| Au | 14.712863561 | 14.134926966 | 18.582726674 |
| Au | 14.218759282 | 13.492378360 | 11.590156700 |

---

|    |              |              |              |
|----|--------------|--------------|--------------|
| Au | 19.551415553 | 12.619016318 | 17.856939851 |
| Au | 9.779112082  | 15.019056502 | 12.388754099 |
| Au | 18.864794910 | 12.890065102 | 14.765768646 |
| Au | 10.013198780 | 14.483731775 | 15.302782462 |
| Au | 18.709028226 | 10.589783409 | 12.902596231 |
| Au | 10.584565185 | 16.819196659 | 17.205513909 |
| Au | 18.561785697 | 16.869768854 | 14.053463100 |
| Au | 9.606262696  | 10.879706143 | 15.831479786 |
| Au | 20.719826654 | 15.092947260 | 15.879921043 |
| Au | 7.708908375  | 12.927916819 | 14.412831468 |
| S  | 16.825617838 | 15.102399243 | 18.494485499 |
| S  | 12.565970802 | 11.875032448 | 11.839257959 |
| S  | 18.346749121 | 10.709630049 | 17.477324053 |
| S  | 11.693487859 | 16.304269704 | 12.054412415 |
| S  | 16.742310706 | 18.242551651 | 14.433916860 |
| S  | 11.309558239 | 9.499412130  | 15.123558306 |
| S  | 12.859845496 | 12.738621742 | 18.692745771 |
| S  | 15.868081809 | 15.124544559 | 11.507538366 |
| S  | 16.607171045 | 9.871492207  | 12.303590871 |
| S  | 12.653896220 | 17.816174459 | 17.381284544 |
| S  | 20.584914214 | 11.395667635 | 14.022820312 |
| S  | 8.601241473  | 15.704440649 | 16.828927419 |
| S  | 20.854094808 | 14.517688345 | 18.122160440 |
| S  | 7.822924579  | 13.746954883 | 12.264304722 |
| S  | 20.574756141 | 15.788317832 | 13.667898402 |
| S  | 7.754384234  | 12.077215910 | 16.574105448 |
| S  | 14.948822840 | 9.951215093  | 16.384035452 |
| C  | 22.557343204 | 13.886505721 | 18.552955097 |
| C  | 23.097245383 | 12.747670719 | 17.677585674 |
| C  | 23.658671585 | 13.211260426 | 16.332148807 |

---

|   |              |              |              |
|---|--------------|--------------|--------------|
| C | 24.684942273 | 14.335944842 | 16.501916050 |
| C | 24.093138557 | 15.507772057 | 17.293716096 |
| C | 23.554512032 | 15.051384019 | 18.653512307 |
| C | 21.666685136 | 12.369732510 | 12.888305782 |
| C | 21.003600922 | 12.798973136 | 11.580038598 |
| C | 21.978512366 | 13.618859817 | 10.723510275 |
| C | 23.303809275 | 12.884467131 | 10.490319296 |
| C | 23.937901896 | 12.437371863 | 11.812291004 |
| C | 22.960341601 | 11.588953223 | 12.637794940 |
| C | 21.789778633 | 17.181117633 | 13.504945233 |
| C | 21.512377810 | 17.958126864 | 12.215598461 |
| C | 22.540101005 | 19.083607544 | 12.030777814 |
| C | 23.976525683 | 18.549162087 | 12.064570078 |
| C | 24.241649315 | 17.750413147 | 13.345475570 |
| C | 23.214823772 | 16.624098826 | 13.525209936 |
| C | 17.057183589 | 14.834544764 | 10.125884279 |
| C | 18.183904136 | 15.866137768 | 10.259110380 |
| C | 19.160356857 | 15.782927264 | 9.080750187  |
| C | 18.436615794 | 15.928024029 | 7.739158283  |
| C | 17.325902401 | 14.880947032 | 7.609420891  |
| C | 16.335457653 | 14.957741819 | 8.780950702  |
| C | 16.157164325 | 18.710599836 | 12.741761844 |
| C | 17.233948310 | 19.492582435 | 11.985723925 |
| C | 16.722087120 | 19.909895190 | 10.599964624 |
| C | 15.419017620 | 20.709689798 | 10.700231585 |
| C | 14.352626280 | 19.929310280 | 11.476334977 |
| C | 14.856283594 | 19.508333151 | 12.864768590 |
| C | 11.257952973 | 18.035900418 | 12.511915191 |
| C | 11.040979490 | 18.247625201 | 14.005046408 |
| C | 10.735200440 | 19.714749176 | 14.320626554 |

---

|   |              |              |              |
|---|--------------|--------------|--------------|
| C | 9.545012184  | 20.226953139 | 13.503578314 |
| C | 9.761051357  | 20.001250075 | 12.002795848 |
| C | 10.059191146 | 18.526387537 | 11.694230785 |
| C | 7.467385374  | 16.841943240 | 15.901378846 |
| C | 7.393659347  | 18.218608283 | 16.567242036 |
| C | 6.352836079  | 19.117115509 | 15.884950024 |
| C | 4.973874075  | 18.451311957 | 15.844381542 |
| C | 5.055313176  | 17.083086987 | 15.161467208 |
| C | 6.089703559  | 16.173228744 | 15.836905221 |
| C | 6.441316513  | 14.962117528 | 12.077829391 |
| C | 5.109172525  | 14.211368334 | 12.177772785 |
| C | 3.917942273  | 15.144457090 | 11.918567624 |
| C | 4.057595681  | 15.883299749 | 10.583400440 |
| C | 5.389929269  | 16.638095399 | 10.509705342 |
| C | 6.579945912  | 15.696351334 | 10.741255554 |
| C | 6.402119983  | 10.829149128 | 16.749617919 |
| C | 5.062993195  | 11.563574854 | 16.865413807 |
| C | 3.914817445  | 10.583488579 | 17.143585693 |
| C | 4.194787337  | 9.729918380  | 18.385520652 |
| C | 5.532672657  | 8.992747821  | 18.257323220 |
| C | 6.686604688  | 9.966746315  | 17.983772740 |
| C | 11.540620478 | 13.492343173 | 19.747619006 |
| C | 11.993955879 | 13.605752649 | 21.203773169 |
| C | 10.860953476 | 14.173208209 | 22.073797578 |
| C | 9.578523382  | 13.341762245 | 21.951331125 |
| C | 9.146035302  | 13.209675530 | 20.487285793 |
| C | 10.274044447 | 12.639606953 | 19.619674080 |
| C | 12.943552623 | 18.201547204 | 19.155932066 |
| C | 12.627683572 | 17.065513644 | 20.122210489 |
| C | 12.906647329 | 17.479378968 | 21.573131769 |

---

|   |              |              |              |
|---|--------------|--------------|--------------|
| C | 12.152310199 | 18.759775757 | 21.948905591 |
| C | 12.465263018 | 19.894392084 | 20.967451810 |
| C | 12.173997016 | 19.476994745 | 19.518778728 |
| C | 17.403290152 | 10.257099379 | 18.990302464 |
| C | 16.832367880 | 11.443474494 | 19.758255887 |
| C | 15.994055107 | 10.971374483 | 20.950658971 |
| C | 16.804862476 | 10.051782198 | 21.870470013 |
| C | 17.400225166 | 8.872300190  | 21.092399085 |
| C | 18.239723493 | 9.348147061  | 19.895823756 |
| C | 16.338642973 | 9.867925977  | 10.480427497 |
| C | 16.686657010 | 11.182880720 | 9.790267952  |
| C | 16.341042072 | 11.132046047 | 8.296505136  |
| C | 14.863176373 | 10.787855145 | 8.088209846  |
| C | 14.525193397 | 9.447513052  | 8.746544802  |
| C | 14.882740885 | 9.449733634  | 10.238954760 |
| C | 11.672993475 | 8.454593113  | 16.600152756 |
| C | 10.763178824 | 7.221814251  | 16.613041527 |
| C | 11.134990614 | 6.288194242  | 17.775741565 |
| C | 11.105675494 | 7.022353200  | 19.121510801 |
| C | 12.000836988 | 8.266739708  | 19.093194685 |
| C | 11.627310864 | 9.198442914  | 17.934063021 |
| C | 11.496981518 | 11.837801785 | 10.332309956 |
| C | 11.353923981 | 13.173514843 | 9.610112948  |
| C | 10.468466121 | 13.027233630 | 8.366140578  |
| C | 9.100400277  | 12.437144551 | 8.725205297  |
| C | 9.245991228  | 11.096932737 | 9.455443404  |
| C | 10.143294064 | 11.222989798 | 10.694784165 |
| C | 16.750792541 | 16.947241430 | 18.545989450 |
| C | 18.053426235 | 17.505935800 | 17.967991027 |
| C | 18.109785068 | 19.032209906 | 18.099077754 |

---

|   |              |              |              |
|---|--------------|--------------|--------------|
| C | 17.937911895 | 19.473275784 | 19.556032387 |
| C | 16.636530881 | 18.916061598 | 20.141035892 |
| C | 16.561357853 | 17.388411894 | 20.000290713 |
| C | 15.757755249 | 8.583528892  | 15.423509949 |
| C | 14.775024398 | 7.821148296  | 14.534314252 |
| C | 15.476864877 | 6.667369913  | 13.802941664 |
| C | 16.190767967 | 5.729355698  | 14.781139813 |
| C | 17.165778858 | 6.508887404  | 15.667807780 |
| C | 16.462516047 | 7.651788094  | 16.416629558 |
| H | 22.365053049 | 13.492511453 | 19.561997345 |
| H | 22.316958862 | 11.985100421 | 17.533062563 |
| H | 23.909849861 | 12.267523564 | 18.253327982 |
| H | 24.102536824 | 12.352952480 | 15.804795413 |
| H | 22.827246385 | 13.569375383 | 15.697033159 |
| H | 25.041263368 | 14.679088924 | 15.517559965 |
| H | 25.571275960 | 13.947633503 | 17.035747799 |
| H | 24.845378088 | 16.298902355 | 17.438563777 |
| H | 23.268994123 | 15.960503200 | 16.714006971 |
| H | 23.099515874 | 15.893750613 | 19.196421700 |
| H | 24.400101212 | 14.698892967 | 19.271861661 |
| H | 21.906027136 | 13.273770732 | 13.472442635 |
| H | 20.095923630 | 13.381329304 | 11.801433070 |
| H | 20.682151104 | 11.895121144 | 11.032681090 |
| H | 21.507219484 | 13.869141697 | 9.761232546  |
| H | 22.169661350 | 14.579757716 | 11.231608705 |
| H | 24.000159524 | 13.525716295 | 9.927117435  |
| H | 23.119162235 | 11.994618926 | 9.863101587  |
| H | 24.863536010 | 11.870367123 | 11.627424911 |
| H | 24.226249351 | 13.326212011 | 12.402038152 |
| H | 23.414818392 | 11.297386899 | 13.596396172 |



---

|   |              |              |              |
|---|--------------|--------------|--------------|
| H | 22.721681264 | 10.656023834 | 12.098307449 |
| H | 21.638379287 | 17.841116603 | 14.372528519 |
| H | 20.489568973 | 18.364719113 | 12.240306111 |
| H | 21.558585760 | 17.261881606 | 11.359269299 |
| H | 22.345564778 | 19.613744049 | 11.085316412 |
| H | 22.407555428 | 19.825574094 | 12.837433299 |
| H | 24.694437017 | 19.378913708 | 11.975592636 |
| H | 24.140757001 | 17.895475654 | 11.189684797 |
| H | 25.258398844 | 17.327893057 | 13.336257899 |
| H | 24.192478784 | 18.426224215 | 14.217356429 |
| H | 23.390320874 | 16.081540081 | 14.465169142 |
| H | 23.325669905 | 15.889150749 | 12.708846686 |
| H | 17.468476210 | 13.821691101 | 10.244781216 |
| H | 18.710553918 | 15.721353260 | 11.214378877 |
| H | 17.738168509 | 16.875667750 | 10.294027339 |
| H | 19.941042168 | 16.551873398 | 9.193084346  |
| H | 19.676900689 | 14.808845373 | 9.109074500  |
| H | 19.150285535 | 15.832447261 | 6.905899075  |
| H | 17.997800015 | 16.939016345 | 7.666855968  |
| H | 16.785478829 | 14.998160446 | 6.657224826  |
| H | 17.786028800 | 13.877645584 | 7.584624747  |
| H | 15.566191975 | 14.174175475 | 8.699716216  |
| H | 15.802882991 | 15.924381679 | 8.751335202  |
| H | 15.954160103 | 17.765951213 | 12.212045325 |
| H | 18.140032440 | 18.873755709 | 11.894231803 |
| H | 17.515481396 | 20.387331804 | 12.568030101 |
| H | 17.495822349 | 20.492247785 | 10.075536686 |
| H | 16.545287835 | 19.003566723 | 9.993466541  |
| H | 15.049491198 | 20.966437077 | 9.695344664  |
| H | 15.619312621 | 21.665076212 | 11.216763833 |

---

|   |              |              |              |
|---|--------------|--------------|--------------|
| H | 13.434783998 | 20.530327667 | 11.576808318 |
| H | 14.077241806 | 19.025336640 | 10.904362709 |
| H | 14.104425821 | 18.900164268 | 13.390930076 |
| H | 15.034258597 | 20.404315246 | 13.484999559 |
| H | 12.153404078 | 18.595342193 | 12.196807233 |
| H | 11.927578402 | 17.907750900 | 14.559724063 |
| H | 10.207879366 | 17.602906258 | 14.336217644 |
| H | 10.549252806 | 19.820763826 | 15.400602404 |
| H | 11.627126295 | 20.327020306 | 14.097976895 |
| H | 9.364281390  | 21.293263778 | 13.709509718 |
| H | 8.634291099  | 19.688524284 | 13.819691730 |
| H | 8.879294220  | 20.329645473 | 11.430020452 |
| H | 10.607142307 | 20.621722573 | 11.657581546 |
| H | 10.241698878 | 18.378951599 | 10.619016445 |
| H | 9.182455112  | 17.906668002 | 11.956992014 |
| H | 7.877451590  | 16.945104818 | 14.883546842 |
| H | 8.389830320  | 18.687268078 | 16.551592274 |
| H | 7.128076309  | 18.084027228 | 17.630332748 |
| H | 6.304539039  | 20.087659859 | 16.402563145 |
| H | 6.677696920  | 19.333715769 | 14.851904045 |
| H | 4.250073656  | 19.097372219 | 15.323052978 |
| H | 4.598639945  | 18.323928731 | 16.875067910 |
| H | 4.071916422  | 16.586952227 | 15.158389224 |
| H | 5.331429671  | 17.230225458 | 14.102243017 |
| H | 6.167222793  | 15.205910606 | 15.313138520 |
| H | 5.761588383  | 15.943343920 | 16.865652283 |
| H | 6.527187448  | 15.681333944 | 12.905361290 |
| H | 5.027342947  | 13.737419528 | 13.168515677 |
| H | 5.108789333  | 13.393881814 | 11.435535860 |
| H | 2.984383917  | 14.561313098 | 11.943061136 |

---

|   |              |              |              |
|---|--------------|--------------|--------------|
| H | 3.847928844  | 15.881192789 | 12.736022231 |
| H | 3.214588688  | 16.577265596 | 10.440782892 |
| H | 4.008257521  | 15.153981172 | 9.755454995  |
| H | 5.498929391  | 17.140910765 | 9.536264972  |
| H | 5.401475713  | 17.433837040 | 11.275852793 |
| H | 7.531464300  | 16.250252794 | 10.717501988 |
| H | 6.627085947  | 14.951261340 | 9.927854826  |
| H | 6.408206922  | 10.199886074 | 15.847151978 |
| H | 4.877351136  | 12.137316569 | 15.943816458 |
| H | 5.131917173  | 12.298879144 | 17.686724823 |
| H | 2.971235606  | 11.139190673 | 17.259691728 |
| H | 3.783272823  | 9.920860284  | 16.270218785 |
| H | 3.375939441  | 9.012262115  | 18.549491887 |
| H | 4.224307257  | 10.382976577 | 19.275836674 |
| H | 5.745245874  | 8.411658106  | 19.168328016 |
| H | 5.469162710  | 8.265369023  | 17.428885258 |
| H | 7.635134846  | 9.425824991  | 17.841929649 |
| H | 6.827168637  | 10.630024719 | 18.856034247 |
| H | 11.346582945 | 14.494731381 | 19.334999967 |
| H | 12.892703549 | 14.237614732 | 21.271427858 |
| H | 12.281551137 | 12.604578530 | 21.569594696 |
| H | 11.190348631 | 14.227929302 | 23.123206804 |
| H | 10.648791302 | 15.209529764 | 21.757731379 |
| H | 8.773508066  | 13.794416747 | 22.551283075 |
| H | 9.757281960  | 12.335461207 | 22.370367651 |
| H | 8.255314549  | 12.567980296 | 20.397716242 |
| H | 8.856115633  | 14.198846750 | 20.092811896 |
| H | 9.958781256  | 12.588961229 | 18.567072474 |
| H | 10.504069274 | 11.605388448 | 19.932203664 |
| H | 14.023297972 | 18.414776344 | 19.193941793 |

---

|   |              |              |              |
|---|--------------|--------------|--------------|
| H | 13.212811294 | 16.173103368 | 19.843619386 |
| H | 11.562889067 | 16.797012684 | 20.003469969 |
| H | 12.636733946 | 16.656653340 | 22.252831066 |
| H | 13.989495629 | 17.647823346 | 21.705043592 |
| H | 12.401955495 | 19.063411957 | 22.977707345 |
| H | 11.066595305 | 18.558905000 | 21.933241294 |
| H | 11.883022718 | 20.794867622 | 21.217790795 |
| H | 13.530082198 | 20.173689250 | 21.058339688 |
| H | 12.433275414 | 20.286828213 | 18.820390380 |
| H | 11.095258119 | 19.278231156 | 19.393060624 |
| H | 16.557161316 | 9.675738236  | 18.581169407 |
| H | 16.218313372 | 12.058576575 | 19.080585054 |
| H | 17.661815644 | 12.087956895 | 20.098825237 |
| H | 15.615277175 | 11.845354629 | 21.503779942 |
| H | 15.105204667 | 10.433478489 | 20.575405467 |
| H | 16.178856219 | 9.684592536  | 22.698489157 |
| H | 17.625378971 | 10.631609900 | 22.329201225 |
| H | 18.017648564 | 8.243907521  | 21.753491210 |
| H | 16.580745116 | 8.229572144  | 20.723598307 |
| H | 18.621226316 | 8.488455041  | 19.323551516 |
| H | 19.119971921 | 9.911002379  | 20.251552608 |
| H | 17.017985005 | 9.074736904  | 10.122998681 |
| H | 17.751442338 | 11.414188274 | 9.950879094  |
| H | 16.104305935 | 11.986826574 | 10.275710658 |
| H | 16.582525670 | 12.096000197 | 7.825487185  |
| H | 16.967808531 | 10.373051399 | 7.794882260  |
| H | 14.618008202 | 10.762809245 | 7.015195409  |
| H | 14.243539586 | 11.584281389 | 8.538847143  |
| H | 13.454772366 | 9.214708174  | 8.629989719  |
| H | 15.077176248 | 8.642034242  | 8.230839962  |

---

|   |              |              |              |
|---|--------------|--------------|--------------|
| H | 14.700761433 | 8.459225031  | 10.683403140 |
| H | 14.226593671 | 10.156437053 | 10.773429082 |
| H | 12.713250527 | 8.130128566  | 16.431486337 |
| H | 10.829640605 | 6.691181258  | 15.651173173 |
| H | 9.716254611  | 7.557006028  | 16.719870299 |
| H | 10.454359658 | 5.422228468  | 17.791539550 |
| H | 12.149450862 | 5.885916248  | 17.604612199 |
| H | 11.411413915 | 6.344233100  | 19.933936522 |
| H | 10.067362705 | 7.329865383  | 19.340999211 |
| H | 11.934402938 | 8.816875763  | 20.045352334 |
| H | 13.057020144 | 7.961089031  | 18.984212317 |
| H | 12.297261959 | 10.067941744 | 17.903758285 |
| H | 10.606993814 | 9.595071776  | 18.083483639 |
| H | 12.043861471 | 11.136713937 | 9.675832324  |
| H | 12.349242483 | 13.564257797 | 9.345743918  |
| H | 10.904493452 | 13.907987041 | 10.301495908 |
| H | 10.351704450 | 14.008116206 | 7.879436456  |
| H | 10.972381694 | 12.370356580 | 7.633988243  |
| H | 8.486729261  | 12.312425360 | 7.819114498  |
| H | 8.563522227  | 13.143838202 | 9.380562897  |
| H | 8.258906784  | 10.715371929 | 9.759291527  |
| H | 9.676755210  | 10.348435207 | 8.766467123  |
| H | 10.288335104 | 10.244126027 | 11.176194530 |
| H | 9.654762062  | 11.869165997 | 11.441776757 |
| H | 15.896443345 | 17.259802029 | 17.924434707 |
| H | 18.152145851 | 17.206050710 | 16.913273184 |
| H | 18.907602849 | 17.051006481 | 18.499647386 |
| H | 19.063027258 | 19.399815495 | 17.688569066 |
| H | 17.311823862 | 19.477647983 | 17.480096784 |
| H | 17.948974573 | 20.571649002 | 19.630571440 |

---

|   |              |              |              |
|---|--------------|--------------|--------------|
| H | 18.792699538 | 19.106632061 | 20.151341766 |
| H | 16.531714396 | 19.193539659 | 21.201996157 |
| H | 15.784429643 | 19.380014609 | 19.614010117 |
| H | 15.606325525 | 17.002019147 | 20.385783878 |
| H | 17.356091294 | 16.927152072 | 20.611650852 |
| H | 16.521020178 | 9.057849962  | 14.790808055 |
| H | 14.311403596 | 8.512315623  | 13.815271738 |
| H | 13.962450700 | 7.409843939  | 15.155619921 |
| H | 14.738810685 | 6.114510079  | 13.200624673 |
| H | 16.211027661 | 7.089761128  | 13.096843881 |
| H | 16.723799789 | 4.937150536  | 14.231842332 |
| H | 15.444178558 | 5.222908315  | 15.419404013 |
| H | 17.654421147 | 5.841281332  | 16.394630937 |
| H | 17.967940963 | 6.937631286  | 15.042013092 |
| H | 17.199526789 | 8.217427605  | 17.003641446 |
| H | 15.719810941 | 7.238734347  | 17.122434702 |

**c) Au<sub>23</sub>(S-c-C<sub>6</sub>H<sub>11</sub>)<sub>11</sub>BBT<sub>6</sub>**

|    |              |              |              |
|----|--------------|--------------|--------------|
| Au | 14.543338465 | 13.602189974 | 15.291507602 |
| Au | 13.196570628 | 10.130909182 | 15.433416140 |
| Au | 15.248448848 | 16.297673108 | 14.921845399 |
| Au | 15.627103610 | 11.694098565 | 13.700202281 |
| Au | 13.209117328 | 15.594979795 | 16.629998655 |
| Au | 17.322191355 | 14.532992709 | 16.319382573 |
| Au | 11.467901214 | 12.742672730 | 13.786830281 |
| Au | 12.091524591 | 12.703822132 | 16.450995964 |
| Au | 16.928832144 | 14.233054830 | 13.582111947 |
| Au | 16.490762070 | 11.875459754 | 16.345434012 |
| Au | 12.865075198 | 15.292742184 | 13.918076673 |
| Au | 14.782787897 | 13.978124374 | 18.487729284 |

---

|    |              |              |              |
|----|--------------|--------------|--------------|
| Au | 14.182687507 | 13.251007830 | 11.725608582 |
| Au | 19.544236560 | 12.912274842 | 18.033118937 |
| Au | 9.659649214  | 14.829579564 | 12.482563335 |
| Au | 18.848683025 | 12.827268659 | 14.936770629 |
| Au | 10.003939079 | 14.151118083 | 15.479292537 |
| Au | 18.484641905 | 10.389129646 | 13.214555660 |
| Au | 10.448451396 | 16.194285264 | 17.767249788 |
| Au | 18.464583840 | 16.722750676 | 13.950721826 |
| Au | 9.625587998  | 10.496793296 | 15.548084144 |
| Au | 20.695423457 | 15.131101103 | 15.800469509 |
| Au | 7.689688084  | 12.603072366 | 14.499423393 |
| S  | 16.731604549 | 15.265146200 | 18.506833966 |
| S  | 12.545067758 | 11.633116659 | 11.968236226 |
| S  | 18.294352588 | 11.003904320 | 17.867225673 |
| S  | 11.539452170 | 16.154009972 | 12.161689947 |
| S  | 16.639141894 | 18.094333427 | 14.309709564 |
| S  | 11.258953996 | 9.375994776  | 14.351152129 |
| S  | 13.053069419 | 12.419790954 | 18.603032375 |
| S  | 15.813964093 | 14.887745277 | 11.585948557 |
| S  | 16.384181619 | 9.774562168  | 12.432241475 |
| S  | 12.490157120 | 17.112372341 | 18.361534012 |
| S  | 20.418189527 | 11.169015686 | 14.251292487 |
| S  | 8.499666674  | 15.154794212 | 17.089952543 |
| S  | 20.937851191 | 14.765046786 | 18.077233302 |
| S  | 7.728167400  | 13.521242183 | 12.387140991 |
| S  | 20.459636520 | 15.609234739 | 13.539759997 |
| S  | 7.817337024  | 11.556873048 | 16.589515631 |
| S  | 15.095630432 | 9.959198289  | 16.715571022 |
| Br | 11.725701684 | 3.156746299  | 16.117175736 |
| Br | 3.115536459  | 7.182096593  | 17.442447449 |

---

|    |              |              |              |
|----|--------------|--------------|--------------|
| Br | 2.619545900  | 17.301312588 | 11.147000504 |
| Br | 12.312110193 | 23.129821345 | 15.946887314 |
| Br | 15.730743091 | 11.250928852 | 6.160162685  |
| Br | 4.462106048  | 19.400507118 | 14.333751105 |
| C  | 7.445647285  | 16.368469987 | 16.329599811 |
| C  | 6.284891993  | 15.907604627 | 15.687794058 |
| C  | 7.688423229  | 17.747744652 | 16.395235364 |
| C  | 5.392184840  | 16.805504530 | 15.106260962 |
| C  | 6.800011674  | 18.653960205 | 15.814786712 |
| C  | 5.661254094  | 18.173654190 | 15.167668467 |
| C  | 22.634614277 | 14.077193916 | 18.451501074 |
| C  | 23.074951464 | 12.866631693 | 17.616071228 |
| C  | 23.582917116 | 13.224313706 | 16.217788045 |
| C  | 24.661158359 | 14.311441025 | 16.264337225 |
| C  | 24.162538757 | 15.551898703 | 17.015053303 |
| C  | 23.685507763 | 15.198478165 | 18.427046554 |
| C  | 21.487441024 | 12.014962373 | 12.999590572 |
| C  | 20.779378963 | 12.378859736 | 11.695140799 |
| C  | 21.736794477 | 13.106962008 | 10.742750513 |
| C  | 23.017683870 | 12.302940569 | 10.494665977 |
| C  | 23.701221750 | 11.917026976 | 11.811132903 |
| C  | 22.737437863 | 11.168374170 | 12.743733890 |
| C  | 21.679666049 | 16.959697332 | 13.174615993 |
| C  | 21.361244274 | 17.573475373 | 11.808620626 |
| C  | 22.399612809 | 18.640819912 | 11.434619370 |
| C  | 23.825457322 | 18.079864842 | 11.479306333 |
| C  | 24.132314970 | 17.457163909 | 12.845509879 |
| C  | 23.098036593 | 16.385615605 | 13.215879101 |
| C  | 16.887283362 | 14.538779138 | 10.124873115 |
| C  | 18.153020901 | 15.393461157 | 10.230108697 |



---

|   |              |              |              |
|---|--------------|--------------|--------------|
| C | 19.007535086 | 15.278745028 | 8.962407391  |
| C | 18.204083712 | 15.647646605 | 7.712696294  |
| C | 16.955571978 | 14.768521355 | 7.595735905  |
| C | 16.083813610 | 14.851591879 | 8.856494284  |
| C | 16.004369705 | 18.460442971 | 12.608569085 |
| C | 17.049193315 | 19.205978403 | 11.775407396 |
| C | 16.492981413 | 19.507804615 | 10.375991783 |
| C | 15.174968163 | 20.287225252 | 10.448431317 |
| C | 14.144161751 | 19.556207796 | 11.316041317 |
| C | 14.700465588 | 19.253286855 | 12.714523208 |
| C | 11.023394034 | 17.857842446 | 12.634954128 |
| C | 10.515247468 | 18.004797799 | 14.067100116 |
| C | 10.157855498 | 19.468819790 | 14.350942051 |
| C | 9.132496838  | 20.006576365 | 13.348092244 |
| C | 9.633167748  | 19.839466414 | 11.910249809 |
| C | 10.002848771 | 18.379008239 | 11.617305951 |
| C | 11.757536266 | 13.204509516 | 19.663877927 |
| C | 12.280453129 | 13.429814619 | 21.083341902 |
| C | 11.183606118 | 14.051685181 | 21.960435420 |
| C | 9.908104159  | 13.200840269 | 21.957313388 |
| C | 9.406265951  | 12.963457550 | 20.528946062 |
| C | 10.495046140 | 12.339642983 | 19.646193209 |
| C | 11.488272666 | 11.594743161 | 10.452521653 |
| C | 11.313123723 | 12.936786225 | 9.749677539  |
| C | 10.417465278 | 12.796452755 | 8.511799582  |
| C | 9.064823504  | 12.168200164 | 8.866900860  |
| C | 9.248163630  | 10.819499919 | 9.572084584  |
| C | 10.145590620 | 10.950484944 | 10.810277884 |
| C | 17.455744503 | 10.627430714 | 19.466370222 |
| C | 17.056188163 | 11.851497339 | 20.281410248 |

---

|   |              |              |              |
|---|--------------|--------------|--------------|
| C | 16.311319335 | 11.437055083 | 21.555458825 |
| C | 17.143725833 | 10.463288929 | 22.397484205 |
| C | 17.581363293 | 9.248632703  | 21.570594407 |
| C | 18.322971089 | 9.669693196  | 20.291843916 |
| C | 16.330148366 | 17.062776345 | 18.435071099 |
| C | 17.562082660 | 17.832251271 | 17.952732155 |
| C | 17.285854862 | 19.340955410 | 17.945606299 |
| C | 16.833373943 | 19.833463233 | 19.324503049 |
| C | 15.612921269 | 19.049413298 | 19.818596833 |
| C | 15.871122131 | 17.535186202 | 19.817136693 |
| C | 16.083820543 | 8.566338134  | 15.949509389 |
| C | 15.204640151 | 7.609607230  | 15.142099963 |
| C | 16.037366085 | 6.457014534  | 14.564746927 |
| C | 16.802440639 | 5.708840693  | 15.659602200 |
| C | 17.664510161 | 6.675107440  | 16.476723605 |
| C | 16.828304764 | 7.823096961  | 17.062242427 |
| C | 11.310618185 | 7.669446954  | 14.888380621 |
| C | 10.798856211 | 7.222215510  | 16.113782134 |
| C | 11.928112681 | 6.753351691  | 14.023176652 |
| C | 10.916081722 | 5.880903514  | 16.479770821 |
| C | 12.052842615 | 5.410938995  | 14.382220631 |
| C | 11.548240526 | 4.987002009  | 15.612558436 |
| C | 6.546481753  | 10.306204488 | 16.726787661 |
| C | 5.619115125  | 10.032994022 | 15.713891558 |
| C | 6.445671491  | 9.634307919  | 17.954082304 |
| C | 4.600886378  | 9.100886098  | 15.920036168 |
| C | 5.431837299  | 8.700191944  | 18.169075629 |
| C | 4.514464887  | 8.443125408  | 17.148449463 |
| C | 6.342893433  | 14.620343241 | 12.155011336 |
| C | 6.503086333  | 15.820518497 | 11.448966151 |

---

|   |              |              |              |
|---|--------------|--------------|--------------|
| C | 5.058922784  | 14.229044629 | 12.560983358 |
| C | 5.401178773  | 16.623090740 | 11.152868997 |
| C | 3.950274250  | 15.021324778 | 12.260247103 |
| C | 4.129332893  | 16.213977908 | 11.555421187 |
| C | 12.413419749 | 18.746016864 | 17.633317938 |
| C | 13.332684897 | 19.152858559 | 16.657905044 |
| C | 11.474077055 | 19.669624814 | 18.118283324 |
| C | 13.317751211 | 20.459417485 | 16.169984011 |
| C | 11.446720293 | 20.976586201 | 17.629858808 |
| C | 12.370692855 | 21.360652292 | 16.655936041 |
| C | 16.266389058 | 10.217131923 | 10.715383498 |
| C | 17.343616585 | 10.717590671 | 9.970237561  |
| C | 15.030890968 | 10.011297669 | 10.078312225 |
| C | 17.192578516 | 11.016188434 | 8.615181269  |
| C | 14.869032815 | 10.317082874 | 8.727813346  |
| C | 15.952454749 | 10.821091323 | 8.005405602  |
| H | 22.484602322 | 13.750491058 | 19.491685889 |
| H | 22.256508276 | 12.133250397 | 17.558638197 |
| H | 23.895809125 | 12.383576212 | 18.177196799 |
| H | 23.961419525 | 12.317067486 | 15.722096012 |
| H | 22.734918388 | 13.581365750 | 15.604178297 |
| H | 24.976129812 | 14.580955770 | 15.243614738 |
| H | 25.559628567 | 13.916674557 | 16.771862656 |
| H | 24.953220704 | 16.315755966 | 17.071649276 |
| H | 23.326993435 | 16.007989915 | 16.454559421 |
| H | 23.301942650 | 16.089244279 | 18.946836235 |
| H | 24.549426736 | 14.839285973 | 19.015104179 |
| H | 21.785243150 | 12.946533335 | 13.508796737 |
| H | 19.896026510 | 12.998888648 | 11.911908382 |
| H | 20.418484002 | 11.447983362 | 11.222852885 |

---

|   |              |              |              |
|---|--------------|--------------|--------------|
| H | 21.225076266 | 13.317888525 | 9.791620662  |
| H | 21.991696100 | 14.087864383 | 11.179448784 |
| H | 23.709602261 | 12.875259229 | 9.857322826  |
| H | 22.766200689 | 11.383620354 | 9.936933893  |
| H | 24.590796963 | 11.297849917 | 11.617815705 |
| H | 24.057756896 | 12.829805617 | 12.321631850 |
| H | 23.231398288 | 10.925827474 | 13.696483267 |
| H | 22.437737634 | 10.210272590 | 12.285041721 |
| H | 21.563513030 | 17.720272885 | 13.961129728 |
| H | 20.346911657 | 18.001802624 | 11.819987577 |
| H | 21.359644033 | 16.771992212 | 11.048510943 |
| H | 22.172737114 | 19.043551440 | 10.435551137 |
| H | 22.318230730 | 19.486961889 | 12.138966066 |
| H | 24.554361505 | 18.871116928 | 11.246773138 |
| H | 23.937328026 | 17.308954834 | 10.696424377 |
| H | 25.140881096 | 17.016078031 | 12.854478394 |
| H | 24.128848692 | 18.246314616 | 13.617520073 |
| H | 23.303546270 | 15.972356813 | 14.213449525 |
| H | 23.166665190 | 15.544228476 | 12.503940610 |
| H | 17.151124782 | 13.471883371 | 10.150549533 |
| H | 18.728406068 | 15.100309779 | 11.120716206 |
| H | 17.863942723 | 16.448788310 | 10.381241867 |
| H | 19.900906920 | 15.915346247 | 9.060418071  |
| H | 19.372771327 | 14.241535710 | 8.863432529  |
| H | 18.827378692 | 15.548111307 | 6.810669662  |
| H | 17.903395832 | 16.708835744 | 7.774646272  |
| H | 16.356559110 | 15.053062035 | 6.717378207  |
| H | 17.261062014 | 13.722099713 | 7.430788286  |
| H | 15.228732370 | 14.161618771 | 8.784559213  |
| H | 15.663353891 | 15.868863504 | 8.947775563  |

---

|   |              |              |              |
|---|--------------|--------------|--------------|
| H | 15.798804042 | 17.483127495 | 12.143300453 |
| H | 17.967307412 | 18.601674699 | 11.705706054 |
| H | 17.324139990 | 20.146840948 | 12.283726960 |
| H | 17.240839348 | 20.064609698 | 9.790419875  |
| H | 16.324713552 | 18.554229588 | 9.844552790  |
| H | 14.772999545 | 20.452922804 | 9.436972274  |
| H | 15.368052278 | 21.286392950 | 10.877621971 |
| H | 13.223884700 | 20.155317909 | 11.403369654 |
| H | 13.858484148 | 18.605926810 | 10.831166974 |
| H | 13.972339148 | 18.685774346 | 13.314322876 |
| H | 14.892729422 | 20.200292948 | 13.248609567 |
| H | 11.957883333 | 18.431940187 | 12.528715784 |
| H | 11.274445505 | 17.640142677 | 14.776293231 |
| H | 9.627799894  | 17.361146507 | 14.200575740 |
| H | 9.786179130  | 19.566220214 | 15.381113003 |
| H | 11.074462235 | 20.081515803 | 14.301371834 |
| H | 8.911995094  | 21.064982850 | 13.556276437 |
| H | 8.183023889  | 19.455880321 | 13.466620169 |
| H | 8.872403823  | 20.180173927 | 11.190750046 |
| H | 10.520548107 | 20.478448895 | 11.753363168 |
| H | 10.395219474 | 18.269927748 | 10.594870757 |
| H | 9.097576624  | 17.750009124 | 11.684646927 |
| H | 11.524363930 | 14.179640397 | 19.203028816 |
| H | 13.170292284 | 14.078387542 | 21.053468594 |
| H | 12.603594590 | 12.463895262 | 21.509807972 |
| H | 11.559789517 | 14.184313341 | 22.986701760 |
| H | 10.948522842 | 15.060052598 | 21.577164510 |
| H | 9.125608727  | 13.684552127 | 22.562360198 |
| H | 10.119926228 | 12.228155566 | 22.436076042 |
| H | 8.515161138  | 12.316211434 | 20.528996064 |

---

|   |              |              |              |
|---|--------------|--------------|--------------|
| H | 9.092319525  | 13.923491072 | 20.083795868 |
| H | 10.133473452 | 12.227291659 | 18.612155150 |
| H | 10.744707989 | 11.327073731 | 20.009946045 |
| H | 12.046356440 | 10.914356096 | 9.784438447  |
| H | 12.297823539 | 13.350419655 | 9.481047582  |
| H | 10.856289317 | 13.649462340 | 10.459085426 |
| H | 10.275140133 | 13.785067601 | 8.048508339  |
| H | 10.927748145 | 12.169005709 | 7.758935043  |
| H | 8.450133381  | 12.044929602 | 7.961712354  |
| H | 8.512962052  | 12.850246743 | 9.536313357  |
| H | 8.273495799  | 10.403496764 | 9.870723550  |
| H | 9.696371218  | 10.095457661 | 8.868148871  |
| H | 10.307221392 | 9.971837515  | 11.287036870 |
| H | 9.648160393  | 11.583404444 | 11.564511112 |
| H | 16.539122673 | 10.100186719 | 19.146582512 |
| H | 16.422203720 | 12.514575870 | 19.670516817 |
| H | 17.962888532 | 12.428184836 | 20.534599179 |
| H | 16.051761527 | 12.334613767 | 22.138229326 |
| H | 15.355176023 | 10.961666139 | 21.273419036 |
| H | 16.576639491 | 10.137081390 | 23.283395283 |
| H | 18.040896037 | 10.986297928 | 22.772954007 |
| H | 18.223178752 | 8.583216841  | 22.168949495 |
| H | 16.690810267 | 8.658633335  | 21.290879791 |
| H | 18.595186024 | 8.785721883  | 19.694979821 |
| H | 19.265286030 | 10.181217874 | 20.553456815 |
| H | 15.512180668 | 17.178139710 | 17.707423511 |
| H | 17.850915174 | 17.484549693 | 16.948241295 |
| H | 18.413994738 | 17.606965728 | 18.617761197 |
| H | 18.187796988 | 19.879042591 | 17.615265368 |
| H | 16.501266226 | 19.558727304 | 17.200395625 |

---

|   |              |              |              |
|---|--------------|--------------|--------------|
| H | 16.603600419 | 20.909648299 | 19.288695779 |
| H | 17.662486057 | 19.711197466 | 20.043962661 |
| H | 15.327959398 | 19.372796611 | 20.831902777 |
| H | 14.751919254 | 19.270646326 | 19.166285399 |
| H | 14.963427232 | 16.988687748 | 20.113842960 |
| H | 16.654810016 | 17.289365413 | 20.554905736 |
| H | 16.815863134 | 9.049365789  | 15.282905322 |
| H | 14.705045139 | 8.158088456  | 14.330055190 |
| H | 14.410621049 | 7.207528137  | 15.794074837 |
| H | 15.371482359 | 5.771550125  | 14.017732210 |
| H | 16.748185477 | 6.863987235  | 13.825038717 |
| H | 17.427549101 | 4.917446516  | 15.217987715 |
| H | 16.081623790 | 5.206084618  | 16.328470428 |
| H | 18.180153735 | 6.145161201  | 17.292605112 |
| H | 18.452467888 | 7.101853738  | 15.831623028 |
| H | 17.483524104 | 8.515907835  | 17.606002285 |
| H | 16.093345511 | 7.424769213  | 17.783080800 |
| H | 10.316403512 | 7.933381832  | 16.786255917 |
| H | 12.327902450 | 7.096052839  | 13.067669996 |
| H | 10.521067027 | 5.534429070  | 17.434370338 |
| H | 12.538649943 | 4.702569247  | 13.711748181 |
| H | 5.699024799  | 10.556473798 | 14.758803997 |
| H | 7.162231975  | 9.847802843  | 18.749331145 |
| H | 3.877566087  | 8.893026866  | 15.132071527 |
| H | 5.352962214  | 8.182663824  | 19.124513333 |
| H | 7.500262992  | 16.128381048 | 11.129996528 |
| H | 4.927856177  | 13.303057595 | 13.123299915 |
| H | 5.534503657  | 17.558444893 | 10.610353363 |
| H | 2.953982728  | 14.714910883 | 12.577012760 |
| H | 14.055802577 | 18.438600652 | 16.259188238 |

---

|   |              |              |              |
|---|--------------|--------------|--------------|
| H | 10.753858426 | 19.359988821 | 18.876676410 |
| H | 14.034784868 | 20.764020075 | 15.408493066 |
| H | 10.707366445 | 21.685826067 | 18.000076031 |
| H | 18.306507410 | 10.876835328 | 10.457788329 |
| H | 14.186586288 | 9.628126462  | 10.652094200 |
| H | 18.036676193 | 11.399915363 | 8.042380163  |
| H | 13.906469796 | 10.164214182 | 8.240233704  |
| H | 6.085457162  | 14.835545802 | 15.632992584 |
| H | 8.584742717  | 18.111262814 | 16.900951363 |
| H | 4.500795776  | 16.441438646 | 14.598509647 |
| H | 6.999881085  | 19.724234533 | 15.859622970 |

**d) Au<sub>24</sub>(S-*c*-C<sub>6</sub>H<sub>11</sub>)<sub>2</sub>BBT<sub>16</sub>**

|    |              |              |              |
|----|--------------|--------------|--------------|
| Au | 15.299218041 | 14.890869200 | 14.557153257 |
| Au | 14.482890760 | 12.210062270 | 15.124458916 |
| Au | 16.118518613 | 17.433268819 | 13.766616247 |
| Au | 16.600135606 | 12.721151415 | 13.393331418 |
| Au | 14.128225085 | 17.213304066 | 15.581476684 |
| Au | 18.379853578 | 15.776972536 | 15.723019269 |
| Au | 12.452179227 | 13.836005423 | 13.352201977 |
| Au | 12.886265373 | 14.424619564 | 16.039813671 |
| Au | 17.903709739 | 15.285237317 | 13.058448927 |
| Au | 16.782559710 | 13.297628882 | 16.150233989 |
| Au | 13.654209842 | 16.390844168 | 12.961033595 |
| Au | 15.390238798 | 15.862329330 | 17.813505541 |
| Au | 15.131600434 | 14.105454466 | 11.235408139 |
| Au | 20.068970879 | 14.172542343 | 17.700702237 |
| Au | 10.503059101 | 16.052411594 | 11.707874891 |
| Au | 19.926934987 | 14.102856960 | 14.387232891 |
| Au | 11.127450086 | 15.896817327 | 14.511149092 |



---

|    |              |              |              |
|----|--------------|--------------|--------------|
| Au | 19.705513541 | 11.782398453 | 12.639709037 |
| Au | 11.643296058 | 18.306748243 | 16.467613130 |
| Au | 19.430497807 | 18.071726514 | 13.187066427 |
| Au | 10.942019540 | 12.282715160 | 15.896391272 |
| Au | 21.640475536 | 16.302091284 | 15.402089905 |
| Au | 8.782209718  | 14.137530898 | 14.185691821 |
| Au | 15.909472648 | 9.558867816  | 14.537599483 |
| S  | 17.280130408 | 17.132258676 | 17.338891234 |
| S  | 13.445823825 | 12.540125935 | 11.642876795 |
| S  | 18.483891020 | 12.508762086 | 17.577985360 |
| S  | 12.378964462 | 17.316011215 | 11.171275519 |
| S  | 17.422199805 | 19.201722142 | 12.942594998 |
| S  | 12.582463231 | 10.793895401 | 15.271553172 |
| S  | 13.275905916 | 15.041328388 | 18.313006612 |
| S  | 16.821287824 | 15.668169761 | 10.966629103 |
| S  | 17.636148517 | 10.978841882 | 12.057812678 |
| S  | 13.669231330 | 19.418394224 | 16.532386199 |
| S  | 21.669584021 | 12.781615020 | 13.387589205 |
| S  | 9.859456401  | 16.875093366 | 16.323544763 |
| S  | 22.066814842 | 15.309488990 | 17.442849189 |
| S  | 8.608683018  | 14.723262655 | 11.959983763 |
| S  | 21.529481478 | 17.107513954 | 13.226938717 |
| S  | 8.996046665  | 13.480407945 | 16.409713752 |
| S  | 17.976290067 | 9.833418731  | 15.473082544 |
| S  | 14.209680988 | 8.967164088  | 13.102625542 |
| Br | 3.320033832  | 18.169118373 | 10.566421361 |
| Br | 13.158512508 | 9.840655235  | 22.140083848 |
| Br | 4.427788177  | 19.545832632 | 14.079467539 |
| Br | 4.703878329  | 8.901098456  | 18.003798932 |
| Br | 10.815988124 | 23.441796478 | 12.592273941 |

---

|    |              |              |              |
|----|--------------|--------------|--------------|
| Br | 16.885208749 | 23.932922818 | 17.325549631 |
| Br | 25.941134105 | 21.801843373 | 12.495027313 |
| Br | 23.948951256 | 19.273754242 | 22.170838963 |
| Br | 20.090313578 | 18.129885871 | 23.063294497 |
| Br | 17.414126808 | 9.784290970  | 23.329287878 |
| Br | 21.526113510 | 4.687518475  | 13.898664673 |
| Br | 16.376243920 | 11.471581333 | 5.731366104  |
| Br | 17.072307207 | 3.325474557  | 11.713738395 |
| Br | 13.791945171 | 6.394262340  | 19.848160557 |
| Br | 24.563194440 | 8.563492830  | 17.368039993 |
| Br | 16.230196546 | 19.612982475 | 22.465635511 |
| C  | 18.036212164 | 15.075788446 | 9.703362828  |
| C  | 19.348896130 | 15.838721188 | 9.914144167  |
| C  | 20.354720680 | 15.544335343 | 8.795847855  |
| C  | 19.757633603 | 15.847254493 | 7.418067526  |
| C  | 18.466934566 | 15.052697857 | 7.200078892  |
| C  | 17.438963366 | 15.314864690 | 8.311704263  |
| C  | 12.334172841 | 12.390509509 | 10.178406495 |
| C  | 12.173328341 | 13.664583510 | 9.356162207  |
| C  | 11.244787252 | 13.424838705 | 8.157580259  |
| C  | 9.887494359  | 12.867410545 | 8.600685952  |
| C  | 10.054646161 | 11.593605098 | 9.436883707  |
| C  | 10.986346129 | 11.823948187 | 10.634716324 |
| C  | 7.200087322  | 15.792011032 | 11.707708569 |
| C  | 6.037849792  | 15.650449983 | 12.476944209 |
| C  | 7.208666395  | 16.683653899 | 10.625008989 |
| C  | 4.885090908  | 16.365943109 | 12.149959810 |
| C  | 6.061933502  | 17.405585814 | 10.297008760 |
| C  | 4.900590961  | 17.228514521 | 11.052337763 |
| C  | 8.411896317  | 17.632369441 | 15.628805303 |

---

|   |              |              |              |
|---|--------------|--------------|--------------|
| C | 8.439581073  | 18.526213359 | 14.549103664 |
| C | 7.185467990  | 17.276417886 | 16.210435191 |
| C | 7.254229182  | 19.086005802 | 14.076090769 |
| C | 5.996633204  | 17.837002870 | 15.744867177 |
| C | 6.042982586  | 18.748223795 | 14.688476075 |
| C | 7.832946677  | 12.167463467 | 16.757543383 |
| C | 6.695067745  | 11.945576969 | 15.972262947 |
| C | 8.034106914  | 11.400866021 | 17.916492541 |
| C | 5.763863928  | 10.972669202 | 16.338501254 |
| C | 7.110178723  | 10.425711896 | 18.288088482 |
| C | 5.977088284  | 10.221760740 | 17.496023880 |
| C | 14.307780703 | 19.421136890 | 18.190518070 |
| C | 13.677149544 | 18.794814005 | 19.274532997 |
| C | 15.522087468 | 20.095056295 | 18.389282583 |
| C | 14.248279941 | 18.848231674 | 20.545416853 |
| C | 16.094226423 | 20.158116057 | 19.658760918 |
| C | 15.452212613 | 19.532691926 | 20.728985707 |
| C | 11.924132641 | 18.983245343 | 11.632487238 |
| C | 12.283336542 | 19.551964214 | 12.860237730 |
| C | 11.227316040 | 19.756016686 | 10.691211203 |
| C | 11.947690943 | 20.873708823 | 13.154830966 |
| C | 10.892695285 | 21.080680257 | 10.974220828 |
| C | 11.257566657 | 21.630373969 | 12.206017094 |
| C | 17.349760216 | 11.172790585 | 10.317077588 |
| C | 18.374649697 | 11.410923794 | 9.390391747  |
| C | 16.038135358 | 10.966826391 | 9.854879074  |
| C | 18.092180269 | 11.471437695 | 8.024740965  |
| C | 15.747048600 | 11.046966282 | 8.493646821  |
| C | 16.776184102 | 11.312691293 | 7.587941973  |
| C | 14.928543523 | 7.397195195  | 12.684309427 |

---

|   |              |              |              |
|---|--------------|--------------|--------------|
| C | 15.707261670 | 7.259517792  | 11.521745898 |
| C | 14.757530552 | 6.280603674  | 13.523822234 |
| C | 16.337131645 | 6.050796356  | 11.224536268 |
| C | 15.370960547 | 5.063726245  | 13.227084506 |
| C | 16.169125182 | 4.963626814  | 12.084323296 |
| C | 18.866707788 | 8.388863072  | 15.044327543 |
| C | 18.274277921 | 7.179063944  | 14.622310996 |
| C | 20.275634377 | 8.458114447  | 15.131807712 |
| C | 19.057263706 | 6.081206681  | 14.283917913 |
| C | 21.065065406 | 7.362272746  | 14.800900753 |
| C | 20.450204976 | 6.180958554  | 14.373071444 |
| C | 18.049303462 | 11.887417368 | 19.180555342 |
| C | 17.528442631 | 10.583379447 | 19.240850204 |
| C | 18.342454090 | 12.570553197 | 20.369633314 |
| C | 17.339096003 | 9.956587140  | 20.471827678 |
| C | 18.152031900 | 11.948269629 | 21.605204399 |
| C | 17.663041592 | 10.640297375 | 21.647452222 |
| C | 22.397213690 | 16.489207804 | 18.730670137 |
| C | 22.387555615 | 16.041830079 | 20.060225294 |
| C | 22.843407626 | 17.784105015 | 18.437841641 |
| C | 22.842353649 | 16.868459700 | 21.085214946 |
| C | 23.300359822 | 18.617341218 | 19.460737874 |
| C | 23.306180536 | 18.149262494 | 20.775993777 |
| C | 22.708085971 | 18.449870964 | 13.092433026 |
| C | 23.879675719 | 18.447449065 | 13.861064644 |
| C | 22.512012835 | 19.457659177 | 12.137619247 |
| C | 24.842719607 | 19.442071427 | 13.686474856 |
| C | 23.470789991 | 20.454618240 | 11.956396136 |
| C | 24.630965142 | 20.439237930 | 12.733416721 |
| C | 17.308167156 | 20.448311895 | 14.209527160 |

---

|   |              |              |              |
|---|--------------|--------------|--------------|
| C | 18.304857052 | 20.659133638 | 15.172959390 |
| C | 16.178782884 | 21.283362969 | 14.189483322 |
| C | 18.186591471 | 21.701495631 | 16.092889017 |
| C | 16.051368572 | 22.322891352 | 15.108836980 |
| C | 17.061087667 | 22.527863936 | 16.053057602 |
| C | 18.178992598 | 17.236608498 | 18.871219341 |
| C | 17.884251156 | 16.423235428 | 19.974928297 |
| C | 19.119572700 | 18.267297983 | 19.013566470 |
| C | 18.468294560 | 16.669681326 | 21.216652950 |
| C | 19.712019614 | 18.519321643 | 20.251177786 |
| C | 19.364344517 | 17.730750361 | 21.349405658 |
| C | 13.328280521 | 13.551342591 | 19.275717120 |
| C | 12.122432584 | 12.853497315 | 19.456437055 |
| C | 14.480856834 | 13.122818507 | 19.943647445 |
| C | 12.067026691 | 11.748127803 | 20.302507466 |
| C | 14.427509388 | 12.026507317 | 20.805248053 |
| C | 13.221283268 | 11.348492217 | 20.980577423 |
| C | 22.407977307 | 11.613804859 | 14.519854517 |
| C | 22.177837361 | 11.651361632 | 15.899706960 |
| C | 23.304156609 | 10.668263636 | 13.998012523 |
| C | 22.821811604 | 10.755219313 | 16.753748205 |
| C | 23.954566138 | 9.768451513  | 14.843211203 |
| C | 23.704869635 | 9.816745072  | 16.217010679 |
| C | 12.866964320 | 9.669584309  | 16.625376539 |
| C | 13.792611000 | 9.927596102  | 17.644447742 |
| C | 12.202749906 | 8.435292423  | 16.581978307 |
| C | 14.060004786 | 8.957162014  | 18.608542099 |
| C | 12.466950385 | 7.459326987  | 17.544070903 |
| C | 13.400844702 | 7.728608798  | 18.546843427 |
| H | 18.195992148 | 14.002058398 | 9.872938583  |

---

|   |              |              |              |
|---|--------------|--------------|--------------|
| H | 19.773296699 | 15.578476936 | 10.896831493 |
| H | 19.135953902 | 16.922396017 | 9.943944186  |
| H | 21.270676913 | 16.131185186 | 8.966047118  |
| H | 20.651729130 | 14.481622599 | 8.842579723  |
| H | 20.485370993 | 15.617971242 | 6.624600130  |
| H | 19.541855478 | 16.927958562 | 7.345208006  |
| H | 18.016826724 | 15.293071268 | 6.225009242  |
| H | 18.705496208 | 13.977275550 | 7.173738800  |
| H | 16.552328305 | 14.676279968 | 8.176320452  |
| H | 17.092910024 | 16.361154475 | 8.250355057  |
| H | 12.851260962 | 11.630908346 | 9.565071074  |
| H | 13.159163105 | 14.029756529 | 9.028331749  |
| H | 11.745920277 | 14.449772800 | 10.006414558 |
| H | 11.114092729 | 14.365329507 | 7.600364746  |
| H | 11.724974339 | 12.714577577 | 7.460903233  |
| H | 9.252101126  | 12.666910354 | 7.724540036  |
| H | 9.362788486  | 13.627310308 | 9.204980298  |
| H | 9.077227665  | 11.237693701 | 9.797438122  |
| H | 10.466366297 | 10.788490318 | 8.803046851  |
| H | 11.138362890 | 10.892514723 | 11.200674210 |
| H | 10.526415826 | 12.546240389 | 11.331843533 |
| H | 6.033824602  | 14.978524461 | 13.336571145 |
| H | 8.115578418  | 16.809405577 | 10.030890441 |
| H | 3.982194454  | 16.255454376 | 12.749141326 |
| H | 6.069862516  | 18.093274648 | 9.451907703  |
| H | 9.391184061  | 18.786498776 | 14.082714509 |
| H | 7.165184222  | 16.568372526 | 17.040458263 |
| H | 7.271551037  | 19.784863081 | 13.240352296 |
| H | 5.045973775  | 17.576793341 | 16.208979444 |
| H | 6.540888077  | 12.533613022 | 15.065543622 |

---

|   |              |              |              |
|---|--------------|--------------|--------------|
| H | 8.922769284  | 11.562263920 | 18.529000798 |
| H | 4.878758473  | 10.801028218 | 15.726596583 |
| H | 7.269704679  | 9.830550678  | 19.186617004 |
| H | 12.740143803 | 18.257554710 | 19.123867900 |
| H | 16.026640177 | 20.568539793 | 17.547458128 |
| H | 13.758358214 | 18.359246419 | 21.386729627 |
| H | 17.035986430 | 20.684282856 | 19.808748979 |
| H | 12.832136840 | 18.956568887 | 13.591542076 |
| H | 10.950862389 | 19.322299922 | 9.728717105  |
| H | 12.222742208 | 21.303478676 | 14.118238174 |
| H | 10.359614758 | 21.682205694 | 10.238823223 |
| H | 19.398646871 | 11.549108096 | 9.742094947  |
| H | 15.244615449 | 10.746318861 | 10.571220451 |
| H | 18.891633599 | 11.650093649 | 7.306818376  |
| H | 14.727035419 | 10.902665108 | 8.138256682  |
| H | 15.854289574 | 8.119250626  | 10.866695287 |
| H | 14.157834602 | 6.380017817  | 14.429890372 |
| H | 16.966156113 | 5.961267258  | 10.339404772 |
| H | 15.244485697 | 4.206349494  | 13.887910634 |
| H | 17.188206040 | 7.104300217  | 14.553532776 |
| H | 20.749435410 | 9.386401503  | 15.451568295 |
| H | 22.150086486 | 7.428685245  | 14.870225525 |
| H | 17.304678515 | 10.047029055 | 18.316118915 |
| H | 18.745501405 | 13.583643668 | 20.325824100 |
| H | 16.956406957 | 8.936900720  | 20.517613057 |
| H | 18.391867973 | 12.474799674 | 22.528607079 |
| H | 22.030770649 | 15.037403862 | 20.293079738 |
| H | 22.844367546 | 18.135616058 | 17.404582636 |
| H | 22.832656918 | 16.520480088 | 22.116757405 |
| H | 23.657086250 | 19.621379665 | 19.233112885 |

---

|   |              |              |              |
|---|--------------|--------------|--------------|
| H | 24.038055168 | 17.664566411 | 14.605571574 |
| H | 21.599405320 | 19.469273559 | 11.539532420 |
| H | 25.749708731 | 19.439138918 | 14.290281344 |
| H | 23.313028987 | 21.239766786 | 11.217847597 |
| H | 19.177657690 | 20.004164515 | 15.198299581 |
| H | 15.391382487 | 21.115238890 | 13.452779497 |
| H | 18.964590205 | 21.868809907 | 16.837515766 |
| H | 15.172028776 | 22.965748337 | 15.093106571 |
| H | 17.158337982 | 15.615179139 | 19.868005460 |
| H | 19.367882848 | 18.895662528 | 18.156686069 |
| H | 18.203427899 | 16.059474760 | 22.079696028 |
| H | 20.430027614 | 19.330387592 | 20.362749947 |
| H | 11.224553567 | 13.181197546 | 18.930241524 |
| H | 15.424965163 | 13.647990869 | 19.794045264 |
| H | 11.134647110 | 11.200663012 | 20.437036889 |
| H | 15.323074889 | 11.706203213 | 21.332670363 |
| H | 21.474907100 | 12.375818845 | 16.314472934 |
| H | 23.488300177 | 10.629454123 | 12.923626973 |
| H | 22.626091777 | 10.785627896 | 17.825274517 |
| H | 24.646834661 | 9.032648049  | 14.434345044 |
| H | 14.310301400 | 10.887500343 | 17.685013356 |
| H | 11.491751664 | 8.230042466  | 15.780773785 |
| H | 14.773198984 | 9.162493575  | 19.404534595 |
| H | 11.958082008 | 6.496499660  | 17.507382098 |
| H | 18.589485340 | 5.155922311  | 13.947930162 |

**e) Au<sub>25</sub>(S-c-C<sub>6</sub>H<sub>11</sub>)<sub>2</sub>BBT<sub>16</sub>**

|    |              |              |              |
|----|--------------|--------------|--------------|
| Au | 14.904742194 | 15.066300155 | 15.017291948 |
| Au | 14.839122256 | 17.814040133 | 14.274113112 |
| Au | 15.085189745 | 12.267778725 | 15.650537922 |



---

|    |              |              |              |
|----|--------------|--------------|--------------|
| Au | 15.028648242 | 15.540119125 | 12.128844278 |
| Au | 14.823132463 | 14.599976948 | 17.877285506 |
| Au | 16.102003702 | 13.109314199 | 13.208788168 |
| Au | 13.776343932 | 17.114169994 | 16.739634091 |
| Au | 12.627302361 | 16.053470250 | 13.545801509 |
| Au | 17.179910714 | 14.095524537 | 16.464766112 |
| Au | 12.729043710 | 13.823496231 | 16.243742235 |
| Au | 17.153480095 | 16.166738674 | 13.767477795 |
| Au | 16.600583680 | 16.842433007 | 16.597827543 |
| Au | 13.246220450 | 13.330381040 | 13.402359722 |
| Au | 12.125670099 | 19.084625637 | 14.937740103 |
| Au | 17.887080233 | 11.126480624 | 14.871080430 |
| Au | 15.132692698 | 19.994819111 | 16.698782177 |
| Au | 14.857788704 | 10.345448507 | 13.172595204 |
| Au | 10.239446127 | 13.625085086 | 13.993472230 |
| Au | 19.613475759 | 16.386802637 | 16.046928034 |
| Au | 11.917929274 | 14.602863345 | 10.962984838 |
| Au | 17.961403545 | 15.385147033 | 19.072659544 |
| Au | 17.735238616 | 14.999629845 | 10.866936216 |
| Au | 12.209778484 | 15.069158181 | 19.139355521 |
| Au | 16.556099030 | 18.303781654 | 11.414019924 |
| Au | 13.406210831 | 11.766572883 | 18.546364873 |
| S  | 9.789160456  | 14.206314947 | 11.800914772 |
| S  | 20.082847241 | 15.787790871 | 18.231114980 |
| S  | 13.969575206 | 15.129016481 | 10.002231338 |
| S  | 15.875118215 | 14.990203514 | 20.016490516 |
| S  | 17.656838986 | 12.741204962 | 11.409107663 |
| S  | 12.343171583 | 17.335217875 | 18.639302735 |
| S  | 10.434849903 | 13.140316576 | 16.250254640 |
| S  | 19.431304079 | 16.884538852 | 13.793760334 |

---

|    |              |              |              |
|----|--------------|--------------|--------------|
| S  | 13.293807968 | 20.937561137 | 15.657562723 |
| S  | 17.025666601 | 9.547228782  | 13.403194850 |
| S  | 10.826621937 | 17.588067696 | 13.725099692 |
| S  | 18.997122223 | 12.547199774 | 16.332917542 |
| S  | 18.113612129 | 17.172440512 | 10.144711993 |
| S  | 11.777293739 | 12.866780779 | 19.755175157 |
| S  | 17.216239509 | 19.091780223 | 17.208871124 |
| S  | 12.673017241 | 11.038364653 | 12.858136086 |
| S  | 15.165021798 | 19.638062418 | 12.699886095 |
| S  | 14.862113037 | 10.484029271 | 17.272495349 |
| Br | 15.208107072 | 9.732448621  | 6.222719499  |
| Br | 14.917863756 | 20.372435328 | 23.736882008 |
| Br | 6.934318926  | 9.366811875  | 8.598169181  |
| Br | 23.017268965 | 20.612905148 | 21.384748348 |
| Br | 16.410405654 | 17.596312906 | 3.912336072  |
| Br | 12.896011945 | 12.260172405 | 26.102476599 |
| Br | 7.444010030  | 17.869359834 | 19.510346059 |
| Br | 22.664212166 | 12.333470511 | 10.515779954 |
| Br | 13.283463579 | 20.691909057 | 6.779494409  |
| Br | 16.216215679 | 9.633486482  | 23.625488436 |
| Br | 18.882895893 | 19.526497832 | 23.438032150 |
| Br | 11.126362022 | 10.292455935 | 6.624745275  |
| Br | 19.915406980 | 9.223470129  | 21.810022828 |
| Br | 19.019837578 | 23.883015116 | 15.703875974 |
| Br | 11.102872512 | 5.807316442  | 14.839778813 |
| Br | 16.639574524 | 3.781485363  | 16.320375618 |
| C  | 16.872009870 | 11.961947349 | 10.009679079 |
| C  | 13.208105060 | 18.070541832 | 20.012505949 |
| C  | 9.078786643  | 12.813289147 | 10.947380075 |
| C  | 20.800876602 | 17.181023715 | 19.081688433 |

---

|   |              |              |              |
|---|--------------|--------------|--------------|
| C | 9.562116578  | 14.466504591 | 17.074021562 |
| C | 20.355219749 | 15.601919678 | 12.959952086 |
| C | 16.388986300 | 12.687246925 | 8.909520371  |
| C | 13.233900738 | 17.462021039 | 21.277536533 |
| C | 17.748598881 | 16.157366881 | 7.587180708  |
| C | 11.842041348 | 13.778194111 | 22.368672134 |
| C | 17.114006869 | 18.471221672 | 7.923131854  |
| C | 12.623465314 | 11.512917469 | 22.013789530 |
| C | 17.591758341 | 17.258922243 | 8.439776556  |
| C | 12.142485049 | 12.722638746 | 21.495178123 |
| C | 9.071502320  | 12.812162717 | 9.544899584  |
| C | 20.872066575 | 17.158617297 | 20.481823188 |
| C | 16.781786399 | 18.580621587 | 6.574238806  |
| C | 12.820839655 | 11.363617944 | 23.386033080 |
| C | 8.420152685  | 11.798868353 | 8.844406825  |
| C | 21.542019335 | 18.170033410 | 21.168897404 |
| C | 8.424352199  | 11.789181577 | 11.644583848 |
| C | 21.401680320 | 18.229915639 | 18.373163550 |
| C | 7.771270051  | 10.770636099 | 10.950012058 |
| C | 22.070734440 | 19.246656873 | 19.054425600 |
| C | 16.921963809 | 17.467452907 | 5.743623956  |
| C | 12.548444506 | 12.435179923 | 24.237314190 |
| C | 7.777746815  | 10.782863881 | 9.554624262  |
| C | 22.135700355 | 19.207477940 | 20.447799944 |
| C | 16.848329761 | 10.558537403 | 9.962689038  |
| C | 13.754234337 | 19.354358055 | 19.871991600 |
| C | 13.710347542 | 16.677668229 | 9.162914315  |
| C | 16.023994089 | 13.486547192 | 20.959757337 |
| C | 13.711635208 | 16.668492035 | 7.761073638  |
| C | 15.884150814 | 13.586306184 | 22.351710383 |

---

|   |              |              |              |
|---|--------------|--------------|--------------|
| C | 18.461654157 | 20.224585089 | 19.353511121 |
| C | 11.368782070 | 9.885471048  | 10.762001150 |
| C | 15.890393551 | 10.633271398 | 7.752817234  |
| C | 14.232433103 | 19.439827564 | 22.228543024 |
| C | 15.946881867 | 5.763074031  | 14.376158504 |
| C | 19.137291295 | 11.636125319 | 17.858608524 |
| C | 16.352354118 | 9.892879788  | 8.842857743  |
| C | 14.258937715 | 20.045015182 | 20.971085534 |
| C | 17.407320129 | 16.256010899 | 6.237909069  |
| C | 12.052532564 | 13.641943205 | 23.740849388 |
| C | 15.908296624 | 12.028793342 | 7.778443373  |
| C | 13.742830791 | 18.141523700 | 22.384235593 |
| C | 16.968506179 | 18.402693034 | 19.912893362 |
| C | 13.004204810 | 11.555270226 | 10.122454060 |
| C | 13.566005363 | 17.859057107 | 7.048020003  |
| C | 15.966831367 | 12.447334089 | 23.154166700 |
| C | 16.909778430 | 7.986035044  | 14.258106870 |
| C | 17.534544642 | 19.249813889 | 18.954517186 |
| C | 12.352458819 | 10.818760802 | 11.119136828 |
| C | 13.557641095 | 17.889783320 | 9.848066580  |
| C | 16.245847043 | 12.235118029 | 20.371931430 |
| C | 18.507147190 | 10.400859938 | 18.071433534 |
| C | 19.988878747 | 12.151870257 | 18.848216601 |
| C | 17.359097690 | 18.484704025 | 21.250063658 |
| C | 12.644747203 | 11.396201449 | 8.784474947  |
| C | 16.293597204 | 20.791384422 | 13.465030706 |
| C | 13.781084674 | 9.228110810  | 16.608756589 |
| C | 18.839975473 | 20.331421035 | 20.692353198 |
| C | 11.022764458 | 9.701205219  | 9.422835963  |
| C | 16.013839371 | 7.019620744  | 13.778559101 |

---

|   |              |              |              |
|---|--------------|--------------|--------------|
| C | 8.766852323  | 14.143277989 | 18.181537798 |
| C | 21.138268054 | 15.972057026 | 11.858741751 |
| C | 8.278217291  | 16.481612177 | 18.504693931 |
| C | 21.742322239 | 13.663174598 | 11.520861849 |
| C | 9.694015111  | 15.805658129 | 16.682405263 |
| C | 20.283489962 | 14.254953288 | 13.338742442 |
| C | 8.123283093  | 15.153205552 | 18.902168053 |
| C | 21.834035716 | 15.000885700 | 11.134979254 |
| C | 17.753632978 | 7.674732934  | 15.332017578 |
| C | 9.052401129  | 16.817156262 | 17.391461199 |
| C | 20.975102506 | 13.280952375 | 12.624203416 |
| C | 19.603292296 | 10.200147742 | 20.207949527 |
| C | 13.422846888 | 19.086101502 | 9.144863079  |
| C | 16.305580549 | 11.089741853 | 21.165182614 |
| C | 18.298308971 | 19.444417085 | 21.625459153 |
| C | 11.653038343 | 10.475051927 | 8.447463497  |
| C | 18.749676376 | 9.674060767  | 19.236419504 |
| C | 20.216796720 | 11.441056389 | 20.025809603 |
| C | 13.428987648 | 19.058147369 | 7.749113995  |
| C | 16.168257033 | 11.206221629 | 22.548492135 |
| C | 17.684098905 | 6.421707723  | 15.943660877 |
| C | 16.775437385 | 5.477235136  | 15.463442194 |
| C | 17.923424522 | 22.638671513 | 14.762651083 |
| C | 12.178679255 | 7.195887214  | 15.583354375 |
| C | 16.687462595 | 23.049171105 | 14.261653001 |
| C | 13.357229847 | 6.866153894  | 16.252231682 |
| C | 17.547160371 | 20.403500314 | 13.957159552 |
| C | 12.583562782 | 9.539040150  | 15.949564378 |
| C | 15.874669546 | 22.121069906 | 13.607827923 |
| C | 14.160634050 | 7.888677742  | 16.761135953 |

---

|   |              |              |              |
|---|--------------|--------------|--------------|
| C | 18.366803629 | 21.324666491 | 14.604353337 |
| C | 11.779934748 | 8.525982847  | 15.432466483 |
| C | 12.160100987 | 21.987014116 | 16.667033576 |
| C | 12.902947159 | 23.238659934 | 17.141814624 |
| C | 11.921970823 | 24.210211759 | 17.815279633 |
| C | 11.157992036 | 23.534537990 | 18.959822054 |
| C | 10.446973897 | 22.261890178 | 18.483521320 |
| C | 11.426554698 | 21.290137746 | 17.808522338 |
| C | 10.618703885 | 18.600166771 | 12.172524698 |
| C | 9.724810527  | 19.804741237 | 12.494122416 |
| C | 9.473905677  | 20.647662814 | 11.236016656 |
| C | 8.860659542  | 19.804458004 | 10.114692433 |
| C | 9.746437800  | 18.595680899 | 9.798631023  |
| C | 10.031539354 | 17.750766125 | 11.047966533 |
| H | 11.621740430 | 18.954443426 | 11.890005116 |
| H | 10.191456036 | 20.413745308 | 13.284293403 |
| H | 8.763501428  | 19.440466031 | 12.896527991 |
| H | 8.820828173  | 21.496713148 | 11.488313284 |
| H | 10.430304196 | 21.078655021 | 10.891328951 |
| H | 8.710940229  | 20.414920659 | 9.210845819  |
| H | 7.861079300  | 19.456224836 | 10.429254673 |
| H | 9.279038847  | 17.960066272 | 9.030816479  |
| H | 10.701661821 | 18.945523280 | 9.372741861  |
| H | 10.727661129 | 16.934631521 | 10.796710208 |
| H | 9.102939279  | 17.271238156 | 11.401252492 |
| H | 11.420117438 | 22.284826705 | 15.902265742 |
| H | 13.411382470 | 23.723343956 | 16.294508607 |
| H | 13.689490979 | 22.938051848 | 17.855834670 |
| H | 12.465172294 | 25.095982802 | 18.178434349 |
| H | 11.202122028 | 24.573931422 | 17.060703317 |

---

|   |              |              |              |
|---|--------------|--------------|--------------|
| H | 10.430594499 | 24.236173255 | 19.395961627 |
| H | 11.867102205 | 23.275603900 | 19.765994717 |
| H | 9.951394008  | 21.757093148 | 19.326442764 |
| H | 9.650777255  | 22.532894356 | 17.767892130 |
| H | 10.905904147 | 20.395438978 | 17.434527413 |
| H | 12.158566431 | 20.943342520 | 18.552018459 |
| H | 16.388069958 | 13.777277422 | 8.935997028  |
| H | 12.851003953 | 16.447447792 | 21.398233098 |
| H | 18.139265762 | 15.216291311 | 7.977637001  |
| H | 11.436964416 | 14.711540541 | 21.974085536 |
| H | 16.983129144 | 19.329766944 | 8.582794376  |
| H | 12.864564712 | 10.688899585 | 21.340529315 |
| H | 9.590764451  | 13.599991829 | 8.997232651  |
| H | 20.390822668 | 16.353935964 | 21.039616966 |
| H | 16.393620492 | 19.519463399 | 6.180680620  |
| H | 13.216263821 | 10.429003483 | 23.782592062 |
| H | 8.435213043  | 11.786663799 | 7.755548916  |
| H | 21.579951591 | 18.161326001 | 22.257170023 |
| H | 8.431238770  | 11.786180732 | 12.735996786 |
| H | 21.341919007 | 18.252650701 | 17.283658094 |
| H | 7.271073158  | 9.969287838  | 11.493134329 |
| H | 22.530532462 | 20.066241053 | 18.502964711 |
| H | 17.232456301 | 9.978695665  | 10.801298028 |
| H | 13.813273447 | 19.810033659 | 18.880771435 |
| H | 13.843890344 | 15.728705250 | 7.223011208  |
| H | 15.704138503 | 14.559415478 | 22.810666582 |
| H | 18.902173379 | 20.892413030 | 18.611747866 |
| H | 10.861433673 | 9.307469329  | 11.535355821 |
| H | 15.238670746 | 5.020196037  | 14.011270160 |
| H | 16.334375429 | 8.803897032  | 8.816315933  |

---

|   |              |              |              |
|---|--------------|--------------|--------------|
| H | 14.690878817 | 21.037028420 | 20.842805276 |
| H | 17.520741365 | 15.395163426 | 5.579620249  |
| H | 11.832931978 | 14.468644508 | 24.416036834 |
| H | 15.545058340 | 12.602647786 | 6.925607833  |
| H | 13.755586070 | 17.661621559 | 23.362790114 |
| H | 16.205569735 | 17.685846672 | 19.616281816 |
| H | 13.804347655 | 12.244657431 | 10.390167801 |
| H | 13.587232782 | 17.853334318 | 5.958366479  |
| H | 15.850606251 | 12.524945552 | 24.234771932 |
| H | 13.539198576 | 17.890501512 | 10.938641506 |
| H | 16.385410883 | 12.157684978 | 19.293578347 |
| H | 17.814706110 | 10.007751158 | 17.326323845 |
| H | 20.485640272 | 13.110106391 | 18.694613672 |
| H | 16.929908045 | 17.805176460 | 21.985124974 |
| H | 13.135629830 | 11.987845662 | 8.014405451  |
| H | 19.572606605 | 21.076907030 | 20.999238001 |
| H | 10.251607387 | 8.983103237  | 9.146692059  |
| H | 15.347157246 | 7.258588601  | 12.948748529 |
| H | 8.666854413  | 13.104474037 | 18.497649085 |
| H | 21.192411453 | 17.017467157 | 11.553784549 |
| H | 10.321281469 | 16.061008163 | 15.829257495 |
| H | 19.666632699 | 13.965786479 | 14.188282416 |
| H | 7.514825755  | 14.903959126 | 19.770932220 |
| H | 22.436430191 | 15.285790061 | 10.273133004 |
| H | 18.467852328 | 8.415133770  | 15.695992520 |
| H | 9.173162383  | 17.856397342 | 17.087560179 |
| H | 20.901709765 | 12.234398781 | 12.917266823 |
| H | 13.323689549 | 20.028635383 | 9.682610620  |
| H | 16.456479790 | 10.115477308 | 20.704765561 |
| H | 18.266006859 | 8.709160049  | 19.390023324 |



---

|   |              |              |              |
|---|--------------|--------------|--------------|
| H | 20.876634280 | 11.847365748 | 20.791556743 |
| H | 18.333969515 | 6.186105980  | 16.786218631 |
| H | 16.355102856 | 24.079204722 | 14.386531017 |
| H | 13.656366166 | 5.825227151  | 16.368474217 |
| H | 17.875464590 | 19.368842557 | 13.852957616 |
| H | 12.285512175 | 10.581660527 | 15.832603312 |
| H | 14.898785340 | 22.426476615 | 13.229866503 |
| H | 15.092687607 | 7.638068757  | 17.269244166 |
| H | 19.331111538 | 21.012029778 | 15.002609313 |
| H | 10.860643962 | 8.774818269  | 14.903523544 |

**f) Au<sub>25</sub>BBT<sub>18</sub>**

|    |              |              |              |
|----|--------------|--------------|--------------|
| Au | 15.001349759 | 14.998334475 | 14.999664145 |
| Au | 14.920378185 | 17.770701426 | 14.342956709 |
| Au | 15.079262062 | 12.227295274 | 15.656394880 |
| Au | 15.097394636 | 15.518376356 | 12.101143874 |
| Au | 14.903269826 | 14.480722702 | 17.899181587 |
| Au | 16.108061099 | 13.040250000 | 13.191981072 |
| Au | 13.892054501 | 16.956165568 | 16.806499532 |
| Au | 12.746620756 | 15.998558289 | 13.568257121 |
| Au | 17.254336060 | 13.999336665 | 16.432333383 |
| Au | 12.759872524 | 13.924584348 | 16.267862866 |
| Au | 17.241505733 | 16.074095849 | 13.732222669 |
| Au | 16.728903884 | 16.735303624 | 16.553982798 |
| Au | 13.271875213 | 13.263516636 | 13.445273242 |
| Au | 12.081046389 | 18.959743815 | 15.132393203 |
| Au | 17.917743072 | 11.032506127 | 14.873277651 |
| Au | 15.153349076 | 19.729970538 | 16.805076328 |
| Au | 14.846765398 | 10.264853592 | 13.196442999 |
| Au | 10.290552641 | 13.705407119 | 13.991766427 |

---

|    |              |              |              |
|----|--------------|--------------|--------------|
| Au | 19.711630911 | 16.294624419 | 16.008049869 |
| Au | 11.918336199 | 14.712765580 | 10.949080045 |
| Au | 18.082788082 | 15.288081118 | 19.051686784 |
| Au | 17.784439331 | 14.921920245 | 10.889991797 |
| Au | 12.213135254 | 15.074289716 | 19.109496447 |
| Au | 16.595544956 | 18.240061395 | 11.452791287 |
| Au | 13.403262944 | 11.756289539 | 18.548856550 |
| S  | 9.807710480  | 14.295437788 | 11.808719891 |
| S  | 20.193158008 | 15.706687599 | 18.192124062 |
| S  | 13.988977460 | 15.133354889 | 9.998108959  |
| S  | 16.012074637 | 14.865908083 | 20.001881497 |
| S  | 17.672637413 | 12.657138268 | 11.410017892 |
| S  | 12.323139346 | 17.337306470 | 18.585083526 |
| S  | 10.483671224 | 13.200872455 | 16.242531028 |
| S  | 19.518117099 | 16.796959447 | 13.756723113 |
| S  | 12.982426705 | 20.524910320 | 16.589097923 |
| S  | 17.016571610 | 9.467517050  | 13.416180468 |
| S  | 10.941343690 | 17.555982410 | 13.676940591 |
| S  | 19.057677725 | 12.439584196 | 16.325535560 |
| S  | 18.189420413 | 17.110128126 | 10.223275020 |
| S  | 11.812202160 | 12.886691335 | 19.781715807 |
| S  | 17.334871414 | 19.007773379 | 17.111661579 |
| S  | 12.667162138 | 10.991252448 | 12.887230724 |
| S  | 15.168982894 | 19.553698163 | 12.737255471 |
| S  | 14.827073344 | 10.443614900 | 17.261156267 |
| Br | 15.068197463 | 9.683976545  | 6.276810333  |
| Br | 14.928017391 | 20.311444260 | 23.714840651 |
| Br | 6.832828995  | 9.468860324  | 8.699709247  |
| Br | 23.168508393 | 20.534051979 | 21.301954606 |
| Br | 16.921015112 | 17.674927148 | 3.901804441  |

---

|    |              |              |              |
|----|--------------|--------------|--------------|
| Br | 13.079755637 | 12.325053684 | 26.104743847 |
| Br | 6.951304957  | 17.603993699 | 19.419999303 |
| Br | 23.050917492 | 12.394307477 | 10.578581879 |
| Br | 14.015154685 | 20.563789419 | 6.495805327  |
| Br | 15.984798146 | 9.435629152  | 23.504571820 |
| Br | 18.920231186 | 19.601338214 | 23.351393620 |
| Br | 11.079085306 | 10.398723322 | 6.646955353  |
| Br | 10.226332182 | 20.762076486 | 8.097660734  |
| Br | 19.774655044 | 9.234822121  | 21.907639830 |
| Br | 18.978728845 | 24.179395231 | 15.184100154 |
| Br | 11.018556211 | 5.815621914  | 14.813541568 |
| Br | 13.146330897 | 26.365512042 | 13.803254832 |
| Br | 16.853163932 | 3.624387487  | 16.201947176 |
| C  | 16.856206110 | 11.891065352 | 10.019419011 |
| C  | 13.139002323 | 18.104414469 | 19.974501843 |
| C  | 9.085156300  | 12.897497785 | 10.970180866 |
| C  | 20.915714182 | 17.104672904 | 19.030990441 |
| C  | 9.517248893  | 14.455122036 | 17.073370060 |
| C  | 20.484510838 | 15.542584364 | 12.925388574 |
| C  | 16.342188071 | 12.623772562 | 8.938262319  |
| C  | 13.653710848 | 17.371621400 | 21.054690072 |
| C  | 17.822714325 | 16.108508724 | 7.656022406  |
| C  | 12.178985115 | 13.890484986 | 22.349363621 |
| C  | 17.476097520 | 18.488984765 | 7.948363878  |
| C  | 12.525726132 | 11.510481487 | 22.057831756 |
| C  | 17.762889913 | 17.230152952 | 8.494485686  |
| C  | 12.239234442 | 12.768996420 | 21.510638065 |
| C  | 9.063731671  | 12.877295552 | 9.568505216  |
| C  | 20.937611067 | 17.125089023 | 20.432704089 |
| C  | 17.245318924 | 18.626454713 | 6.580746379  |

---

|   |              |              |              |
|---|--------------|--------------|--------------|
| C | 12.755836609 | 11.373012245 | 23.425581592 |
| C | 8.385803866  | 11.865092615 | 8.890676505  |
| C | 21.615749599 | 18.137228175 | 21.110596490 |
| C | 8.429108962  | 11.890040471 | 11.689857489 |
| C | 21.571887367 | 18.112393952 | 18.311492438 |
| C | 7.750603953  | 10.873748065 | 11.018063665 |
| C | 22.250605333 | 19.128748183 | 18.983456628 |
| C | 17.291419782 | 17.496354904 | 5.762235368  |
| C | 12.709665781 | 12.503111700 | 24.244082352 |
| C | 7.733075227  | 10.871334728 | 9.622282918  |
| C | 22.268167936 | 19.131314091 | 20.379094348 |
| C | 16.825133980 | 10.487890938 | 9.967567807  |
| C | 13.170372859 | 19.507390922 | 20.025293709 |
| C | 13.880027637 | 16.652282734 | 9.074260053  |
| C | 16.120151611 | 13.347104135 | 20.925798130 |
| C | 13.991192852 | 16.570935612 | 7.679206733  |
| C | 16.008829542 | 13.428515229 | 22.320886634 |
| C | 18.630569558 | 20.128717475 | 19.231297518 |
| C | 11.369265885 | 9.871271987  | 10.767690868 |
| C | 15.799879526 | 10.576422093 | 7.788560521  |
| C | 14.196086002 | 19.419041439 | 22.203688915 |
| C | 13.929332667 | 24.360649563 | 15.690373980 |
| C | 16.070465491 | 5.629611757  | 14.314168272 |
| C | 10.841250255 | 18.444711472 | 12.134158880 |
| C | 19.158926706 | 11.553067659 | 17.870073847 |
| C | 16.291531608 | 9.829318404  | 8.860762687  |
| C | 13.704834547 | 20.166271424 | 21.131323947 |
| C | 17.579984202 | 16.236653355 | 6.288190729  |
| C | 12.421197483 | 13.762646304 | 23.717623211 |
| C | 15.824519107 | 11.971542091 | 7.819671812  |

---

|   |              |              |              |
|---|--------------|--------------|--------------|
| C | 14.171465106 | 18.023839970 | 22.172798375 |
| C | 17.040315204 | 18.402275688 | 19.832689102 |
| C | 12.959228488 | 11.597543530 | 10.165981573 |
| C | 13.999842568 | 17.730459916 | 6.902893415  |
| C | 16.000045509 | 12.269016665 | 23.097343727 |
| C | 13.056931066 | 22.097973965 | 15.751029686 |
| C | 16.942233901 | 7.893362823  | 14.253297363 |
| C | 17.663741630 | 19.185514120 | 18.854428400 |
| C | 12.336618723 | 10.814101525 | 11.144450962 |
| C | 13.762294423 | 17.903647384 | 9.689476363  |
| C | 16.237509701 | 12.095690324 | 20.310776785 |
| C | 11.481002415 | 19.674034759 | 11.916492964 |
| C | 18.519693752 | 10.323526376 | 18.088522542 |
| C | 10.020181947 | 17.910989663 | 11.128477720 |
| C | 19.979834115 | 12.086732684 | 18.876312924 |
| C | 17.410393849 | 18.525706584 | 21.171447663 |
| C | 12.588969242 | 11.474110540 | 8.827052009  |
| C | 16.258371538 | 20.790434005 | 13.421594719 |
| C | 13.737755266 | 9.206164279  | 16.577325285 |
| C | 18.985596173 | 20.278299085 | 20.572421304 |
| C | 11.014163075 | 9.721641206  | 9.426520106  |
| C | 13.910243208 | 23.088546076 | 16.258541415 |
| C | 16.089316235 | 6.901915701  | 13.746051962 |
| C | 8.709556473  | 14.046709279 | 18.143259990 |
| C | 21.292181496 | 15.951185630 | 11.855314113 |
| C | 7.992030935  | 16.324276905 | 18.466911282 |
| C | 22.009743125 | 13.673836609 | 11.531373802 |
| C | 9.556819504  | 15.808810709 | 16.712167556 |
| C | 20.444792414 | 14.188799852 | 13.286160433 |
| C | 7.944301559  | 14.981584714 | 18.844050360 |

---

|   |              |              |              |
|---|--------------|--------------|--------------|
| C | 22.057535866 | 15.016390151 | 11.154387232 |
| C | 12.214928887 | 22.396765424 | 14.671969871 |
| C | 17.784355897 | 7.593740687  | 15.332636266 |
| C | 8.794944158  | 16.747165310 | 17.404183089 |
| C | 21.206731384 | 13.250603615 | 12.593926260 |
| C | 10.465615815 | 19.826745755 | 9.736134966  |
| C | 19.534678711 | 10.170558319 | 20.268891184 |
| C | 13.799666203 | 19.067666631 | 8.923581627  |
| C | 16.200031160 | 10.931634832 | 21.076736964 |
| C | 18.381991954 | 19.460583616 | 21.528968431 |
| C | 11.617531637 | 10.539116142 | 8.469633536  |
| C | 11.282291781 | 20.374279271 | 10.727299652 |
| C | 18.718280016 | 9.623128055  | 19.277680687 |
| C | 9.839692939  | 18.593119134 | 9.925788438  |
| C | 20.160443779 | 11.404153657 | 20.078994054 |
| C | 13.920174029 | 18.971251668 | 7.537479090  |
| C | 16.079663498 | 11.028245688 | 22.462862155 |
| C | 12.237741244 | 23.665153771 | 14.089060153 |
| C | 17.761591990 | 6.325076834  | 15.915382026 |
| C | 13.097015312 | 24.637923591 | 14.602753362 |
| C | 16.902477745 | 5.352258971  | 15.401878041 |
| C | 17.879350896 | 22.803133561 | 14.454359545 |
| C | 12.117083245 | 7.192656167  | 15.543515195 |
| C | 16.652411327 | 23.138776955 | 13.882130015 |
| C | 13.343856671 | 6.857372028  | 16.115737614 |
| C | 17.498480783 | 20.471886559 | 13.992756126 |
| C | 12.497574951 | 9.523727131  | 16.005629453 |
| C | 15.840128212 | 22.125931029 | 13.369420088 |
| C | 14.155789260 | 7.870364601  | 16.628992885 |
| C | 18.311445295 | 21.475848488 | 14.512714506 |

---

|   |              |              |              |
|---|--------------|--------------|--------------|
| C | 11.684627479 | 8.519745502  | 15.485328932 |
| H | 16.340333393 | 13.713440353 | 8.972067654  |
| H | 13.655715823 | 16.282189553 | 21.019938296 |
| H | 18.061413430 | 15.128832603 | 8.073274928  |
| H | 11.939874472 | 14.870389368 | 21.932927809 |
| H | 17.416251715 | 19.363867702 | 8.597316334  |
| H | 12.585030154 | 10.635214737 | 21.409480619 |
| H | 9.589709433  | 13.647975628 | 9.003477457  |
| H | 20.411852528 | 16.354474280 | 20.998210059 |
| H | 17.002692619 | 19.602771475 | 6.163996398  |
| H | 12.998437407 | 10.396757104 | 23.842909488 |
| H | 8.386175330  | 11.839760068 | 7.801935709  |
| H | 21.615534588 | 18.162808634 | 22.199391568 |
| H | 8.452441136  | 11.900542298 | 12.781081788 |
| H | 21.549048315 | 18.102044114 | 17.220328393 |
| H | 7.245064169  | 10.088648793 | 11.579349547 |
| H | 22.756355227 | 19.913803856 | 18.422285120 |
| H | 17.231032067 | 9.903105363  | 10.792808705 |
| H | 12.764671517 | 20.091735670 | 19.199913945 |
| H | 14.085079851 | 15.596925462 | 7.197070846  |
| H | 15.914998090 | 14.402487420 | 22.803062253 |
| H | 19.115718003 | 20.742892528 | 18.471694873 |
| H | 10.883984893 | 9.256893851  | 11.527065426 |
| H | 15.402868467 | 4.863906446  | 13.920793838 |
| H | 16.266907849 | 8.740735338  | 8.831012754  |
| H | 13.729199019 | 21.255035200 | 21.160125637 |
| H | 17.616306651 | 15.360361274 | 5.641538045  |
| H | 12.384737130 | 14.638782518 | 24.364666125 |
| H | 15.434742243 | 12.549510726 | 6.981656037  |
| H | 14.561218771 | 17.445229034 | 23.010384139 |

---

|   |              |              |              |
|---|--------------|--------------|--------------|
| H | 16.255881109 | 17.700948404 | 19.549428274 |
| H | 13.743622249 | 12.299042845 | 10.448862804 |
| H | 14.098034205 | 17.666444324 | 5.819902382  |
| H | 15.901970137 | 12.333078800 | 24.180346015 |
| H | 13.635158635 | 17.966455706 | 10.769885743 |
| H | 16.364483486 | 12.032693157 | 19.230343378 |
| H | 12.150352298 | 20.080208545 | 12.675311075 |
| H | 17.850522536 | 9.916370142  | 17.329724605 |
| H | 9.511701861  | 16.959930950 | 11.286897709 |
| H | 20.488936590 | 13.037734203 | 18.718581184 |
| H | 16.944080335 | 17.893437204 | 21.924570708 |
| H | 13.055200501 | 12.106356680 | 8.073949707  |
| H | 19.742583810 | 21.005355022 | 20.863965472 |
| H | 10.257184797 | 8.994609527  | 9.134827948  |
| H | 14.575452172 | 22.858427425 | 17.091913676 |
| H | 15.423924648 | 7.130897141  | 12.912214117 |
| H | 8.685121239  | 12.997072168 | 18.437600088 |
| H | 21.316759951 | 17.000799168 | 11.561007537 |
| H | 10.194154889 | 16.132062194 | 15.889679102 |
| H | 19.807527565 | 13.865238581 | 14.108808057 |
| H | 7.318109464  | 14.663591825 | 19.676944968 |
| H | 22.683736945 | 15.334331385 | 10.321472229 |
| H | 11.534685299 | 21.636456921 | 14.285021871 |
| H | 18.465103294 | 8.353500364  | 15.720185219 |
| H | 8.834924798  | 17.798635890 | 17.121628269 |
| H | 21.167023723 | 12.199158245 | 12.876277906 |
| H | 13.743539951 | 20.039353167 | 9.410281306  |
| H | 16.256145751 | 9.959926849  | 20.590176435 |
| H | 11.774419404 | 21.333995657 | 10.569965924 |
| H | 18.226491478 | 8.663370834  | 19.435560589 |



---

|   |              |              |              |
|---|--------------|--------------|--------------|
| H | 9.209024087  | 18.168259062 | 9.145624194  |
| H | 20.791272762 | 11.828117809 | 20.859366599 |
| H | 18.412016791 | 6.098124358  | 16.759766800 |
| H | 16.325075644 | 24.176579522 | 13.837918270 |
| H | 13.670916454 | 5.819377570  | 16.159335979 |
| H | 17.824897214 | 19.432172541 | 14.037793960 |
| H | 12.170659012 | 10.563394118 | 15.959950983 |
| H | 14.873321995 | 22.379587117 | 12.933039108 |
| H | 15.122706261 | 7.616009090  | 17.064889065 |
| H | 19.267668854 | 21.222316901 | 14.968710867 |
| H | 10.728437201 | 8.772538533  | 15.028745133 |
| H | 14.597511133 | 25.125542663 | 16.084512777 |
| H | 11.587181322 | 23.891136895 | 13.244485825 |

---

## IV. References

- S1 D. Kratzert, J. J. Holstein, I. Krossing, *J. Appl. Crystallogr.* 2015, **48**, 933-938.
- S2 K. Momma, F. Izumi, *J. Appl. Crystallogr.*, 2011, **44**, 1272-1276.
- S3 L. Krause, R. Herbst-Irmer, G. M. Sheldrick and D. Stalke, *J. Appl. Crystallogr.* 2015, **48**, 3-10.
- S4 G. M. Sheldrick, *Acta Crystallogr., C. Struct. Chem.*, 2015, **71**, 3-8.
- S5 J. P. Perdew, K. Burke, and M. Ernzerhof, *Phys. Rev. Lett.* 1996, **77**, 3865-3868.
- S6 J. P. Perdew, K. Burke, and M. Ernzerhof, *Phys. Rev. Lett.* 1997, **78**, 1396-1396.
- S7 P. E. Blöchl, *Phys. Rev. B* 1994, **50**, 17953-17979.
- S8 G. Kresse, D. Joubert, *Phys. Rev. B* 1999, **59**, 1758-1775.
- S9 S. Grimme, J. Antony, S. Ehrlich, H. Krieg, *J. Chem. Phys.* 2010, **132**, 154104-154119.
